# Supplementary material
Source: Elsevier journal article supplement (http://lescmeng.ai/wp-content/uploads/mmc2.pdf)
Supplement: mmc2 [file mmc2.pdf]

## Article

Hybrid Li-Ion and Li-O<sub>2</sub> Battery Enabled by Oxyhalogen-Sulfur ElectrochemistryA Hybrid Li-Ion and Li-O<sub>2</sub> Battery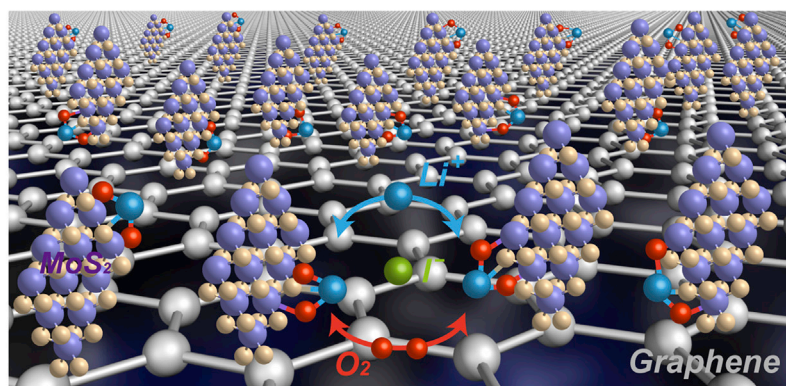

## Oxyhalogen-Sulfur Electrochemistry

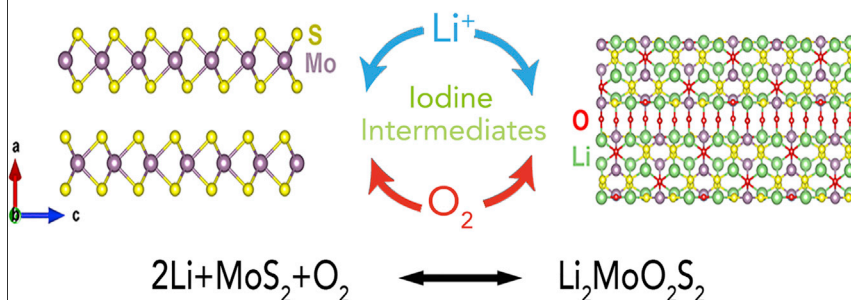

A hybrid Li-ion/Li-O<sub>2</sub> battery was constructed based on oxyhalogen-sulfur electrochemistry. Both Li ions and O anions can be reversibly stored in the MoS<sub>2</sub> structure, forming a Li<sub>2</sub>MoO<sub>2</sub>S<sub>2</sub> compound. This hybrid Li-ion/Li-O<sub>2</sub> cell combines the advantages of Li-ion and Li-O<sub>2</sub> batteries, which paves a way to push the limit of current Li-ion batteries and transition to the next generation of high-energy batteries.

Xuefeng Wang, Yejing Li,  
Xuanxuan Bi, ..., Khalil Amine,  
Jun Lu, Ying Shirley Meng

junlu@anl.gov (J.L.)  
shirleymeng@ucsd.edu (Y.S.M.)

## HIGHLIGHTS

Oxyhalogen-sulfur electrochemistry helps to build a hybrid Li-ion/Li-O<sub>2</sub> battery

Both Li ions and O anions can be reversibly stored in the MoS<sub>2</sub> structure

The Li<sub>2</sub>MoO<sub>2</sub>S<sub>2</sub> is isostructural to the Li<sub>2</sub>MoO<sub>4</sub> rather than other thiomolybdates

Article

# Hybrid Li-Ion and Li-O<sub>2</sub> Battery Enabled by Oxyhalogen-Sulfur Electrochemistry

Xuefeng Wang,<sup>1</sup> Yejing Li,<sup>1</sup> Xuanxuan Bi,<sup>2</sup> Lu Ma,<sup>3</sup> Tianpin Wu,<sup>3</sup> Mahsa Sina,<sup>1</sup> Shen Wang,<sup>1</sup> Minghao Zhang,<sup>1,4</sup> Judith Alvarado,<sup>1,4</sup> Bingyu Lu,<sup>1</sup> Abhik Banerjee,<sup>1</sup> Khalil Amine,<sup>2</sup> Jun Lu,<sup>2,\*</sup> Q1 and Ying Shirley Meng<sup>1,4,5,\*</sup>

## SUMMARY

The large voltage hysteresis between charge and discharge results in significant energy loss, which hinders practical application of the high-energy Li-O<sub>2</sub> battery. Oxyhalogen-sulfur electrochemistry offers a new hybrid Li-ion/Li-O<sub>2</sub> battery, where both Li ions and O anions are reversibly stored in the MoS<sub>2</sub> structure. A Li<sub>2</sub>MoO<sub>2</sub>S<sub>2</sub> compound is formed as the main discharge product that has never been previously observed in the literature. The reaction mechanism and the structure of the Li<sub>2</sub>MoO<sub>2</sub>S<sub>2</sub> are probed by Raman spectroscopy, X-ray photoelectron spectroscopy, X-ray absorption spectroscopy, differential electrochemical mass spectrometry, and UV-visible spectroscopy. The results show that the MoS<sub>2</sub> is oxidized during discharge and is recovered during charge. The iodine intermediates play an important role in triggering the sequence of electrochemical and chemical reactions in the cell. The Li<sub>2</sub>MoO<sub>2</sub>S<sub>2</sub> is isostructural to the Li<sub>2</sub>MoO<sub>4</sub> rather than adopting structures of other known molybdenum oxysulfides.

## Context & Scale

The lithium-oxygen (Li-O<sub>2</sub>) battery is known for its high capacity but encounters large voltage hysteresis and poor cycling stability. In contrast, conventional Li-ion batteries have low polarization and long cycling life but show low capacity based on the intercalation chemistry. A combination of the Li-O<sub>2</sub> batteries and Li-ion batteries in one electrochemical system is expected to combine their advantages and avoid their disadvantages, which will show promise in meeting the future energy requirement. In this work, a hybrid Li-ion/Li-O<sub>2</sub> battery was constructed based on the oxyhalogen-sulfur electrochemistry. Both Li ions and O anions can be reversibly stored in the MoS<sub>2</sub> structure, forming a Li<sub>2</sub>MoO<sub>2</sub>S<sub>2</sub> compound. The iodine intermediates play an important role in triggering the sequence of electrochemical and chemical reactions in the cell. This hybrid Li-ion/Li-O<sub>2</sub> cell paves a way to push the limit of current Li-ion batteries and transition to the next generation of high-energy batteries.

## INTRODUCTION

The discovery of a new material such as graphene<sup>1</sup> brought innovation to various research areas. For the energy-storage field, a potential high-energy system can be constructed based on a novel electrochemical reaction. Much effort has been made in both experimental and computational methods to find new compounds. One of the promising approaches is through the electrochemical process in chemical batteries where some thermodynamically metastable materials exist as intermediate products. The advantage of the electrochemical process is the ability to control the stoichiometric ratio precisely and continuously at room temperature. Electrochemical experiments have been useful in determining the phase diagram of well-known materials that include Li<sub>x</sub>C<sub>6</sub> and Na<sub>x</sub>CoO<sub>2</sub>, which are known as intercalation battery materials.<sup>2–4</sup> More work needs to be done to discover new materials for high-energy-density batteries.

The aprotic Li-O<sub>2</sub> battery is a promising energy-storage technology because of its extremely high theoretical energy density (3,500 Wh kg<sup>-1</sup> based on the reaction 2Li + O<sub>2</sub> → Li<sub>2</sub>O<sub>2</sub>).<sup>5,6</sup> However, for it to be a practical technology several challenges need to be addressed, for example, unclear reaction mechanism, large voltage hysteresis, unstable electrolyte, and Li-metal dendritic growth. Recent progress showed that the reaction pathway and discharge products vary depending on the electrolyte and catalyst species.<sup>7</sup> Electrolyte solvents with a high donor number promote the dissolution of LiO<sub>2</sub> intermediate to form Li<sub>2</sub>O<sub>2</sub>.<sup>8,9</sup> Disproportionating from unstable LiO<sub>2</sub> to Li<sub>2</sub>O<sub>2</sub> can be partly inhibited by the iridium catalyst, forming LiO<sub>2</sub> as the main

discharge product.<sup>10</sup> Combining the reduced graphene oxide (rGO) and lithium iodide (LiI) results in LiOH formation; however, the electrochemical reversibility of the LiOH is still under debate.<sup>11–14</sup> Researchers aim to facilitate the sluggish reaction on the interface between the oxygen gas (O<sub>2</sub>(g)), the Li ions in the liquid electrolyte, and the solid catalyst support. With the assistance of distinctive catalysts and/or redox mediators, the large voltage hysteresis of the Li-O<sub>2</sub> battery can be reduced to a certain extent, although it is still not comparable with that of Li-ion batteries based on the intercalation reaction.

The significant volume change of the cathode is another severe problem that hinders the practicality of Li-O<sub>2</sub> batteries. The accumulation of sporadic discharge products can clog the pores of the electrode. As a result, the battery shuts down. The host structure that leads the growth of solid discharge product and accommodates O<sub>2</sub>(g) will keep the electrode active for long-term cycling.

Herein, a hybrid Li-ion/Li-O<sub>2</sub> battery based on two-dimensional molybdenum sulfide (MoS<sub>2</sub>) is constructed to solve the aforementioned issues. MoS<sub>2</sub> is a well-known electrocatalysis in diverse fields of hydrodesulfurization (HDS),<sup>15,16</sup> photocatalysis,<sup>17,18</sup> hydrogen evolution reaction (HER),<sup>19–21</sup> and oxygen reduction reaction (ORR). Its large interlayer spacing with weak bond interaction allows foreign ions and molecules to intercalate.<sup>22,23</sup> With the assistance of LiI, both Li ions and O anions can be stored into the MoS<sub>2</sub> to form a compound, Li<sub>2</sub>MoO<sub>2</sub>S<sub>2</sub>. The charge/discharge potential curves of this hybrid Li-ion/Li-O<sub>2</sub> battery almost overlap. The reaction mechanism is probed by Raman spectroscopy, X-ray photoelectron spectroscopy (XPS), X-ray absorption spectroscopy (XAS), differential electrochemical mass spectrometry (DEMS), and UV-visible spectroscopy. The enhanced kinetic reaction is due to the synergetic effect of the MoS<sub>2</sub>, O<sub>2</sub>, and LiI. Our findings provide a new insight and deeper understanding for the design of novel architecture for hybrid Li-ion/Li-O<sub>2</sub> batteries.

## RESULTS

Edge-oriented MoS<sub>2</sub> nanosheets mounted on the rGO planes were designed as the cathode catalyst and to support the Li-O<sub>2</sub> batteries. Exposing the active MoS<sub>2</sub> edges enhances its catalytic performance.<sup>24,25</sup> Adding rGO forms a 3D electronic conductive network and guarantees fast charge transfer. Through the hydrothermal reaction (for the detailed method, see [Supplemental Information](#)), the rGO-MoS<sub>2</sub> composite grows on the stainless-steel mesh and its morphology is shown in [Figure 1](#). As expected, MoS<sub>2</sub> nanosheets are vertically aligned on the rGO nanofilms. Electron-dispersive spectroscopy (EDS) mapping confirms the above architecture. The elemental carbon ([Figure 1E](#)) is evenly distributed while both elemental sulfur (S) ([Figure 1F](#)) and molybdenum (Mo) ([Figure 1G](#)) are confined in the local perpendicular sheets. Both the MoS<sub>2</sub> and rGO nanosheets are ultrathin ([Figure 1B](#)) and consist of a few atomic layers ([Figure 1C](#)). Such a few layered MoS<sub>2</sub> with open edges will greatly facilitate the reactions in Li-O<sub>2</sub> batteries, and its open structure may allow insertion of the oxygen anions.

The electrochemical performance of the rGO-MoS<sub>2</sub> is evaluated in a specially designed coin cell with pores on the cathode cap. The electrolyte contained 0.25 mol L<sup>-1</sup> lithium bis(trifluoromethyl) sulfonylimide/dimethoxyethane (LiTFSI/DME) with 0.05 mol L<sup>-1</sup> LiI additive. Adding LiI as a redox mediator facilitates the reactions in Li-O<sub>2</sub> batteries ([Figures 2](#) and [S1](#)). [Figure 2A](#) shows the potential curves of rGO-MoS<sub>2</sub> when both the discharge and charge capacities are limited to

<sup>1</sup>Department of NanoEngineering, University of California San Diego, 9500 Gilman Drive, La Jolla, CA 92093, USA

<sup>2</sup>Chemical Sciences and Engineering Division, Argonne National Laboratory, Argonne, IL 60439, USA

<sup>3</sup>X-ray Science Division, Advanced Photon Sources, Argonne National Laboratory, Lemont, IL 60439, USA

<sup>4</sup>Materials Science and Engineering, University of California San Diego, 9500 Gilman Drive, La Jolla, CA 92093, USA

<sup>5</sup>Lead Contact

\*Correspondence: [junlu@anl.gov](mailto:junlu@anl.gov) (J.L.), [shirleymeng@ucsd.edu](mailto:shirleymeng@ucsd.edu) (Y.S.M.)

<https://doi.org/10.1016/j.joule.2018.07.019>

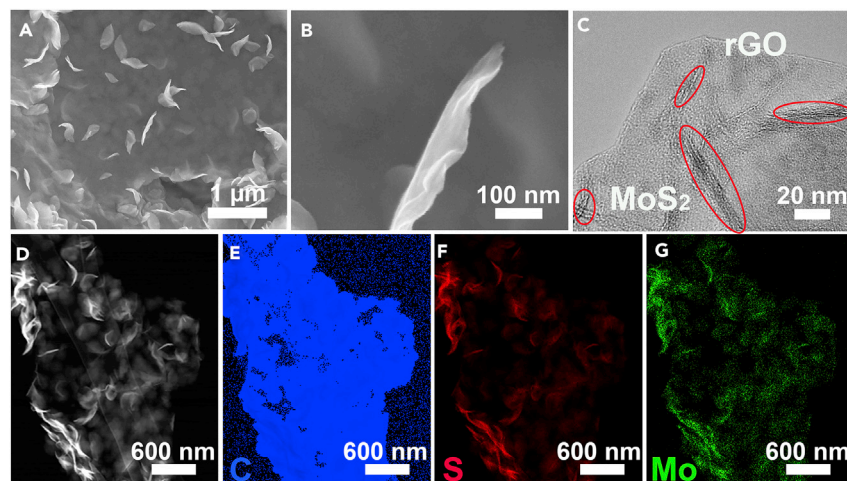

**Figure 1. Morphology of the rGO-MoS<sub>2</sub> Composite**

**Q13** (A and B) Scanning electron microscopy images at different magnifications.

**Q14** (C) Transmission electron microscopy image.

(D–G) Scanning transmission electron microscopy images and the corresponding EDS mappings. Blue, red, and green in (E), (F), and (G) stand for the elemental carbon (C), sulfur (S), and molybdenum (Mo), respectively.

500 mAh g<sup>-1</sup> (calculated by the weight of the rGO-MoS<sub>2</sub>). At the first discharge, the potential curve looks normal with a plateau around 2.65 V, and the charge process finishes before 3.0 V. However, at the second discharge it begins with a novel upper plateau around 2.93 V with 315 mAh g<sup>-1</sup> capacity followed by a typical low plateau around 2.68 V with 150 mAh g<sup>-1</sup> capacity. With continuing cycles, the low plateau gradually vanishes while the upper plateau becomes dominant. It is worth noting that the potential curves of the rGO-MoS<sub>2</sub> almost overlap at the 20th cycle (Figure 2A), similar to that of the conventional Li-ion batteries based on the intercalation chemistry. The voltage gap (the potential difference between the charge and discharge at 250 mAh g<sup>-1</sup>) is as low as 20 mV and increases slightly after 50 cycles with an energy efficiency approaching 99%. This unique feature is very promising for making Li-O<sub>2</sub> batteries of practical use.

To find out the main contributors giving such distinctive potential curves of rGO-MoS<sub>2</sub>, we conducted a series of controlled experiments at the same current density (50 mA g<sup>-1</sup>) and capacity (500 mAh g<sup>-1</sup>), the results of which are shown in Figures 2B, S1, and S2. It is obvious that a combination of MoS<sub>2</sub>, Lil and O<sub>2</sub>(g) is essential to achieve the above lowest polarization (Figures 2B and S1). Absence of any of them will lead to different potential curves and larger voltage hysteresis. Further adjusting the rGO-MoS<sub>2</sub> loading and Lil amount results in the similar potential curves (Figure S2), demonstrating that this kind of potential curve is more related to the nature of the MoS<sub>2</sub> rather than the Lil in the Li-O<sub>2</sub> battery. The distinctive potential curve of rGO-MoS<sub>2</sub> with Lil (Figures 2 and S1), especially the unique upper discharge plateau around 2.93 V, indicates alternative reaction mechanisms associated with MoS<sub>2</sub>, Li ions and O<sub>2</sub>(g).

To investigate the reaction mechanism of the rGO-MoS<sub>2</sub> with Lil, we utilized a series of characterization techniques. Figure 3 demonstrates the results obtained by scanning electron microscopy, Raman spectroscopy, XPS, and XAS. When the cell was first discharged to 300 mAh g<sup>-1</sup>, no obvious morphology changes (Figure 3B)

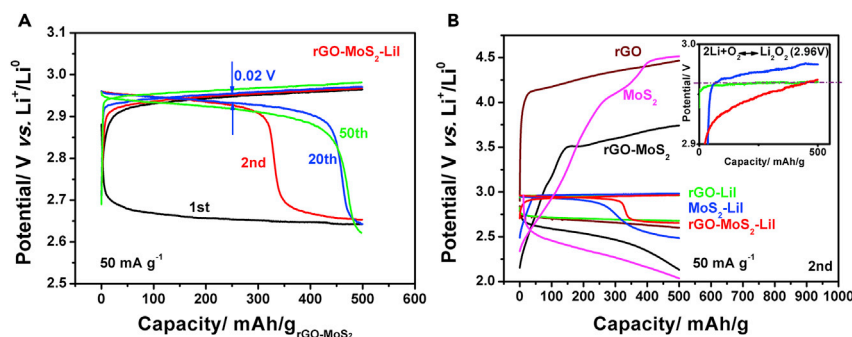

**Figure 2. Potential Curves of Different Electrodes at 0.1 C**

(A) Selected potential curves of the rGO-MoS<sub>2</sub> with Lil at different cycles.

(B) Compared potential curves of rGO, MoS<sub>2</sub>, and rGO-MoS<sub>2</sub> with and without Lil at the second cycle.

were observed (see Figure 3A for the original morphology). Further discharging the cell to 500 mAh g<sup>-1</sup> produces some porous flocculent sheets covering the rGO-MoS<sub>2</sub> (Figure 3C). These sheets are completely removed when the cell is charged to 500 mAh g<sup>-1</sup> (Figure 3D). The morphology recovery after the first cycle indicates that reversible reactions occurred in the cell.

Raman spectroscopy results show that a set of new peaks appeared prominently at 503, 900, and 1,441 cm<sup>-1</sup> at the discharge state (Figure 3E). These peaks are different from any characteristic Raman peaks pertaining to the rGO (D band centered at 1,347 cm<sup>-1</sup> and G band centered at 1,585 cm<sup>-1</sup>), MoS<sub>2</sub> (E<sub>2g</sub><sup>1</sup> band centered at 375 cm<sup>-1</sup> and A<sub>1g</sub> band centered at 402 cm<sup>-1</sup>)<sup>26</sup> and other potential discharge products, such as Li<sub>2</sub>O<sub>2</sub> (795 cm<sup>-1</sup>), LiO<sub>2</sub> (1,123 and 1,505 cm<sup>-1</sup>), LiOH (331 and 600 cm<sup>-1</sup>), Li<sub>2</sub>O (521 cm<sup>-1</sup>), and Li<sub>2</sub>CO<sub>3</sub> (1,093 cm<sup>-1</sup>).<sup>10,27,28</sup> In fact, these new peaks can be ascribed to the vibration among Mo-O (900 cm<sup>-1</sup>)<sup>29</sup> and S-O (503 and 1,441 cm<sup>-1</sup>)<sup>30</sup> bonds, suggesting that the O anions are chemically adsorbed on the MoS<sub>2</sub> after discharge. The intense Mo-S and S-O Raman peaks suggest compound Li-Mo-O-S forms. These new bonds fade after charge (Figure 3E), which demonstrates the electrochemical reaction reversibility between O<sub>2</sub>(g) and MoS<sub>2</sub>.

XPS results demonstrate the oxidation and reduction of the MoS<sub>2</sub> during cycling (Figures 3F and 3G). After discharge, part of S and Mo are oxidized to a high valence to form sulfone (Figure 3F)<sup>31</sup> and Mo<sup>6+</sup> (Figure 3G), respectively. After charge, they return to their original state. Since the signal detected by the XPS is from the surface, XAS was used to detect the chemical state change of the bulk of MoS<sub>2</sub>. The results show that Mo is oxidized after discharge and can be further oxidized with multiple cycles, which is consistent with the XPS results. This is evidenced by the shift of the edge adsorption to the higher energy (Figure 3H), and the 2.93-V plateau dominates the potential curves after 20 cycles (Figure 2A). It is worth mentioning that the oxidation of MoS<sub>2</sub> mainly occurs within the first 300 mAh g<sup>-1</sup> discharge capacity, as indicated by the negligible energy shift of the Mo adsorption edge (Figure 3H) and slight changes of the S 2p (Figure 3F) and Mo 3d (Figure 3G) spectra when the cell was further discharged from 300 mAh g<sup>-1</sup> to 500 mAh g<sup>-1</sup>. These results suggest that two different mechanisms take place consecutively. First, O<sub>2</sub>(g) reacts with MoS<sub>2</sub> and Li ions to form a Li-Mo-S-O compound. Second, O<sub>2</sub>(g) reacts with Li ions to form Li<sub>2</sub>O<sub>2</sub>, which is the dominant reaction product when the cell was further discharged to 2,000 mAh g<sup>-1</sup> (Figure S3).

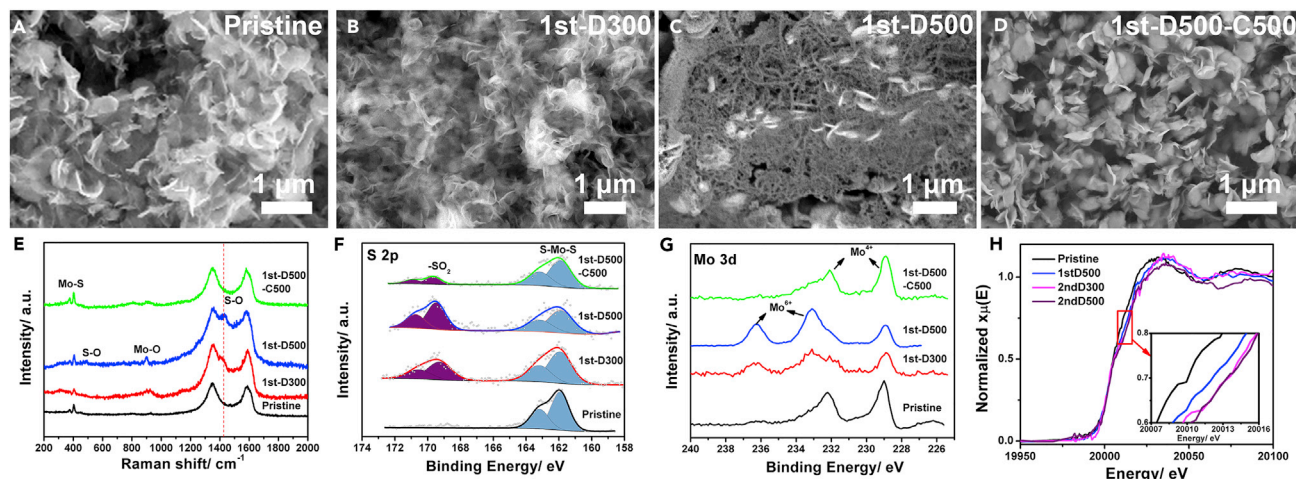

**Figure 3. Characterization of the rGO-MoS<sub>2</sub> Electrode with Lil at Different Discharge/Charge States**

(A–D) The corresponding scanning electron microscopy images of the rGO-MoS<sub>2</sub> electrode when the cell was firstly discharged to 0 mAh g<sup>-1</sup> (denoted as pristine, A), 300 mAh g<sup>-1</sup> (denoted as 1st-D300, B), 500 mAh g<sup>-1</sup> (denoted as 1st-D500, C), and then charged to 500 mAh g<sup>-1</sup> (denoted as 1st-D500-C500, D).

(E–G) Raman spectra (E), S 2p (F), and Mo 3d (G) XPS spectra of the pristine, 1st-D300, 1st-D500, and 1st-D500-C500 rGO-MoS<sub>2</sub> electrode.

(H) XAS spectra (H) from the pristine, 1st-D500, 2nd-D300, and 2nd-D500 rGO-MoS<sub>2</sub> electrode.

Based on the charge and ion transfer number associated with the first 300 mAh g<sup>-1</sup> capacity (Figure 2A), the initial discharge product is believed to be Li<sub>2</sub>MoO<sub>2</sub>S<sub>2</sub>. This is a new material that is not recorded in any of references and databases (e.g., Inorganic Crystal Structure Database). To determine the phase structure we carried out synchrotron X-ray diffraction (XRD), the results of which are shown in Figures 4A and S4. After discharge, a set of new peaks appears and the intensity is enhanced with multiple cycles. These peaks do not match any characteristic patterns of MoS<sub>2</sub>, Li<sub>2</sub>O<sub>2</sub>, or LiOH; however, they are quite similar to that of Li<sub>2</sub>MoO<sub>4</sub> (Figures 4A and S5). By substituting half of the O atoms in Li<sub>2</sub>MoO<sub>4</sub> with S atoms, the XRD pattern can be well refined and the structure of the Li<sub>2</sub>MoO<sub>2</sub>S<sub>2</sub> is determined (Figure 4B and Table S1). As shown in Figure 4B, both Mo and Li atoms coordinate with the O and S atoms to form MoO<sub>2</sub>S<sub>2</sub> and LiO<sub>2</sub>S<sub>2</sub> tetrahedrons. These corner-linked tetrahedrons form a large hexagonal channel and a small distorted hexagonal channel along the crystallographic “c” axis. Compared with the pristine MoS<sub>2</sub> structure, incorporating the Li-O zigzag chain into the MoS<sub>2</sub> structure changes the previous MoS<sub>6</sub> triangular prisms to MoO<sub>2</sub>S<sub>2</sub> tetrahedrons. The O chains bridge the interlayers connecting the structure together (Figure 4B).

The Li<sub>2</sub>MoO<sub>2</sub>S<sub>2</sub> is obtained in the Li-O<sub>2</sub> cell with MoS<sub>2</sub> and Lil through electrochemical reactions. The absence of MoS<sub>2</sub> and Lil leads to form LiOH and Li<sub>2</sub>O<sub>2</sub> in the main reaction products (Figure S3). Considering the cofunction of MoS<sub>2</sub>, Lil, and O<sub>2</sub>(g) to form Li<sub>2</sub>MoO<sub>2</sub>S<sub>2</sub>, it is likely to occur through oxyhalogen-sulfur electrochemical reactions. In the typical oxyhalogen-sulfur chemical reaction, the organic sulfur compounds react with iodates (e.g., HIO, HIO<sub>2</sub>, and HIO<sub>3</sub>) and are oxidized to form sulfoxides (Reaction 1).<sup>32,33</sup>

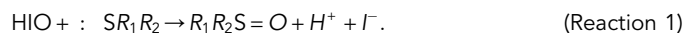

In this case, under an electric field, the inorganic MoS<sub>2</sub> is oxidized by IO<sup>-</sup> (Reaction 1) and inserted by Li ions to form Li<sub>2</sub>MoO<sub>2</sub>S<sub>2</sub> by a sequence of electrochemical and chemical reactions (Reaction 2). The total reaction is

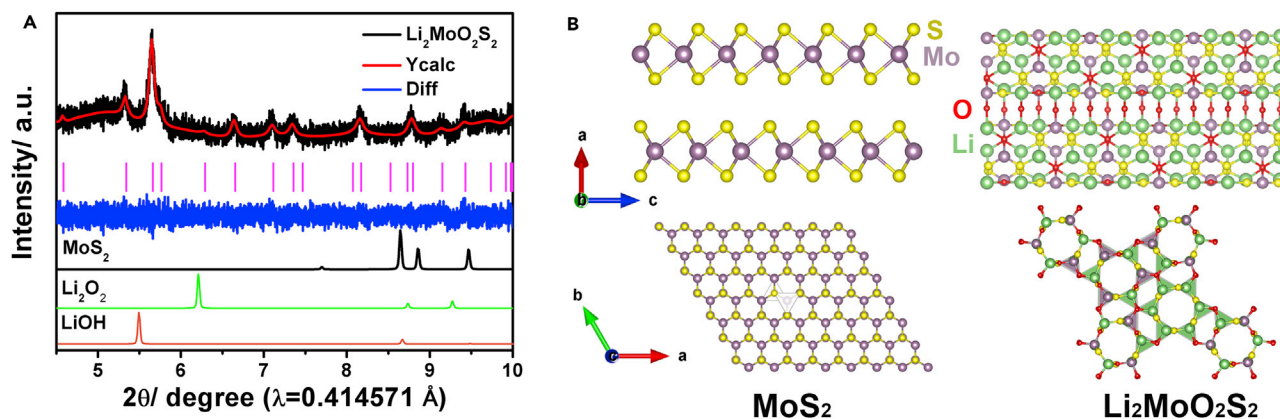

**Figure 4. Structure of Li<sub>2</sub>MoO<sub>2</sub>S<sub>2</sub>**

(A and B) Refined synchrotron XRD pattern of the Li<sub>2</sub>MoO<sub>2</sub>S<sub>2</sub> at seventh discharge (A) and comparison of structural schematic between MoS<sub>2</sub> and Li<sub>2</sub>MoO<sub>2</sub>S<sub>2</sub> (B).

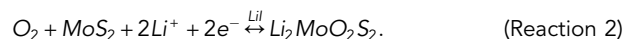

Based on [Reaction 2](#), the theoretical capacity is calculated to be 335 mAh g<sup>-1</sup> (MoS<sub>2</sub>), which is consistent with the capacity at the upper plateau around 2.93 V ([Figure 2A](#)). According to [Reaction 1](#), IO<sup>-</sup> is the key to trigger the oxyhalogen-sulfur electrochemical reaction. In the Li-O<sub>2</sub> battery, IO<sup>-</sup> is formed by the reaction between superoxide, LiI, and trace water in electrolyte,<sup>34</sup> which was captured in the electrolyte by UV-visible spectroscopy ([Figures 5A](#) and [S6A](#)) and Raman spectroscopy ([Figures 5B](#) and [S6B](#)). The adsorption peak at 284 nm ([Figure 5A](#)) and vibration peaks at 486 and 554 cm<sup>-1</sup> ([Figure 5B](#)) belong to IO<sup>-</sup> radical,<sup>35–38</sup> which appears at the discharge state and vanishes at the charge state.

To track the reversibly O<sub>2</sub>(g) consumption and evolution involved in the cycling, we performed DEMS with tetraethylene glycol DME. DME was replaced due to its high volatility. These two solvents showed identical electrochemical behavior ([Figure S7](#)). As shown in [Figure 5C](#), during discharge the O<sub>2</sub>(g) is continually consumed at a rate of 1e<sup>-</sup>/O<sub>2</sub> at the beginning, indicating the formation of superoxide and its stabilization by iodide. At the end of the discharge, the rate is close to 2e<sup>-</sup>/O<sub>2</sub>, which is consistent with the formation of Li<sub>2</sub>MoO<sub>2</sub>S<sub>2</sub> and Li<sub>2</sub>O<sub>2</sub>. The total molar ratio of e<sup>-</sup>/O<sub>2</sub> is about 1.7, less than 2, indicating that some O anion is trapped in the electrolyte in the forms of O<sub>2</sub><sup>-</sup>/IO<sup>-</sup>. O<sub>2</sub>(g) is released in the following charge and no other gas (CO<sub>2</sub> and H<sub>2</sub>) is detected ([Figure 5D](#)), demonstrating the high reversibility of the ORR/oxygen evolution reaction (OER) processes and negligible side reactions. Similar ORR/OER behavior was found in the second cycle ([Figure S8](#)) although their discharge potential curves were different. The low potential at the first discharge is due to the formation of the O<sub>2</sub><sup>-</sup>/IO<sup>-</sup> radicals while some of these radicals remain in the electrolyte after first discharge (3.6 μmol O<sub>2</sub> evolution versus 3.9 μmol O<sub>2</sub> consumption at the first cycle; [Figures 5C](#) and [5D](#)). Therefore, the first cycling can be regarded as an activation process. Thereafter, the characteristic potential curve of MoS<sub>2</sub> shows up from the second cycle via [Reaction 2](#), which corresponds to the upper discharge plateau around 2.93 V ([Figure 2A](#)).

The reaction mechanism of rGO-MoS<sub>2</sub> cell with LiI is summarized in [Figure 6](#). At the discharge, the O<sub>2</sub>(g) is firstly reduced to O<sub>2</sub><sup>-</sup>. The O<sub>2</sub><sup>-</sup> reacts with the LiI and trace amount of H<sub>2</sub>O in the electrolyte to form IO<sup>-</sup>, then the IO<sup>-</sup> oxidizes the MoS<sub>2</sub>. Subsequently, Li ions instantly insert into the structure to form Li<sub>2</sub>MoO<sub>2</sub>S<sub>2</sub>. The resultant

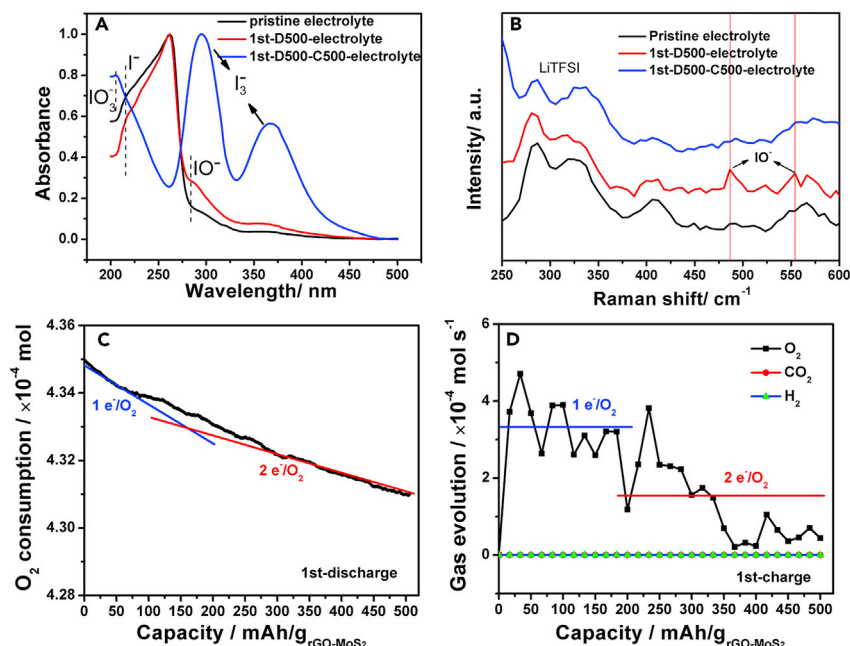

**Q15** **Figure 5.** ■ ■ ■ (A–D) UV spectra (A) and Raman spectra (B) of the pristine, post first discharge, and charge electrolytes; DEMS spectra during first discharge (C) and charge (D) states.

base electrolyte is favorable in generating Li<sub>2</sub>O<sub>2</sub> rather than LiOH.<sup>39</sup> Therefore, Li<sub>2</sub>MoO<sub>2</sub>S<sub>2</sub> is the synergetic result of O<sub>2</sub>(g), MoS<sub>2</sub>, Lil, and trace amount of H<sub>2</sub>O via the oxyhalogen-sulfur electrochemical reactions. Both Lil and H<sub>2</sub>O are essential mediators, and increasing each concentration is beneficial to facilitating the reaction (Figure S9). In contrast, the nanostructure of rGO-MoS<sub>2</sub> is not necessary since the commercial microsize MoS<sub>2</sub> also has similar behavior (Figure S10). Obviously, the nanoarchitecture design of MoS<sub>2</sub> with rGO contributes to enhancement of the kinetic reaction (Figure S11A) and cycling stability (Figure S11B) by providing high surface-active sites and a good conductive network. After more than 100 cycles, the main discharge product is Li<sub>2x</sub>MoO<sub>2x</sub>S<sub>2</sub> (x > 1) (Figure S12) and the charge compensation is provided by MoS<sub>2</sub> (Figure S13).

At the following charge, the I<sup>-</sup> is first oxidized to I<sub>3</sub><sup>-</sup> by electrochemical process, whose presence is evidenced by the UV spectra (Figure 5A). Besides I<sub>3</sub><sup>-</sup>, IO<sub>3</sub><sup>-</sup> also exists in the electrolyte, which shows a characteristic peak at ~207 nm in the UV spectra of electrolyte (Figure 5A).<sup>40</sup> A mixture of I<sup>-</sup>, I<sub>3</sub><sup>-</sup>, IO<sup>-</sup>, and trace H<sub>2</sub>O in the electrolyte could disproportionate into different species of the iodine intermediates, such as IO<sub>3</sub><sup>-</sup>.<sup>41,42</sup> Their disproportionation pathway and rate will be affected by the electrochemical reactions inside the cell. These I-intermediates are believed to promote the decomposition of Li<sub>2</sub>O<sub>2</sub> and Li<sub>2</sub>MoO<sub>2</sub>S<sub>2</sub> to release the O<sub>2</sub>(g) by chemical reactions (Figure 6).<sup>34,43</sup> The chemical reaction between Li<sub>2</sub>MoO<sub>2</sub>S<sub>2</sub>, I<sub>3</sub><sup>-</sup>, and trace H<sub>2</sub>O is confirmed since the Mo-O bond gradually vanishes when the Li<sub>2</sub>MoO<sub>2</sub>S<sub>2</sub> is immersed in the I<sub>3</sub><sup>-</sup>/DME solution with 500 ppm H<sub>2</sub>O (Figure S14). In addition, part of the Li<sub>2</sub>O<sub>2</sub> and Li<sub>2</sub>MoO<sub>2</sub>S<sub>2</sub> are supposed to decompose by electrochemical reactions. For clarification of the charge mechanism, more experimental and computational work is needed to understand the physical/(electro)chemical properties of the Li<sub>2</sub>MoO<sub>2</sub>S<sub>2</sub>. For example, the chemical stability of the Li<sub>2</sub>MoO<sub>2</sub>S<sub>2</sub> at the charge/discharge state needs to be evaluated since some thiomolybdates are found



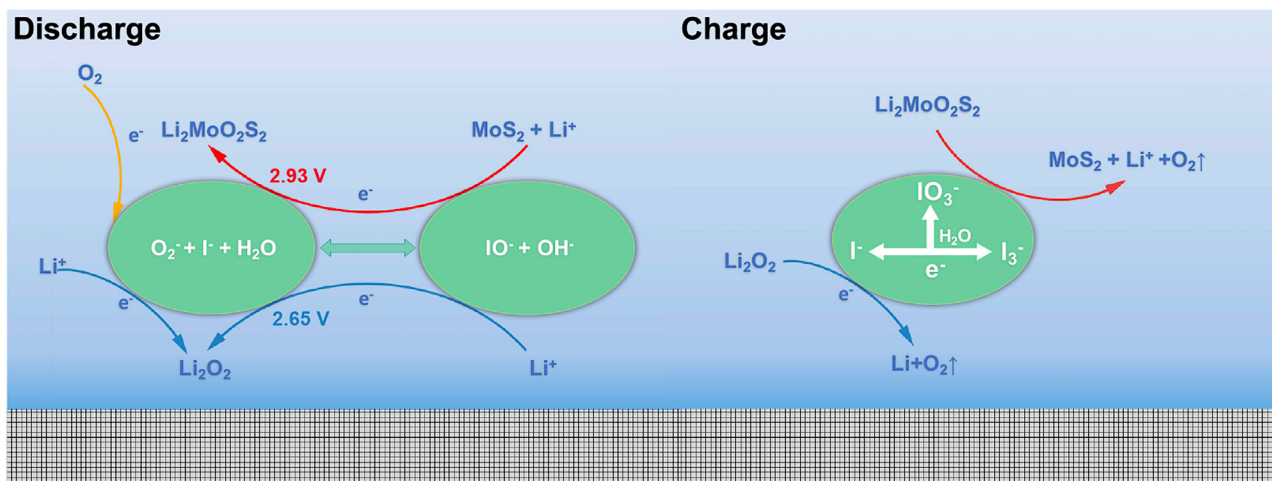

**Figure 6.** Schematic of Reaction Mechanism of rGO-MoS<sub>2</sub> with Lil during Discharge and Charge

to be sensitive to the solution properties, such as pH, and will convert to other intermediate thiomolybdates (MoO<sub>3</sub>S<sup>2-</sup>, MoO<sub>2</sub>S<sub>2</sub><sup>2-</sup>, and MoOS<sub>3</sub><sup>2-</sup>).<sup>44–46</sup>

## DISCUSSION

As demonstrated herein, the rGO-MoS<sub>2</sub> cell requires Li, MoS<sub>2</sub>, O<sub>2</sub>(g), and Lil for the electrochemical reactions, which combine the characteristic cell configuration (host and O<sub>2</sub>) and electrochemical performance (low polarization and high capacity) of the conventional Li-ion battery and Li-O<sub>2</sub> battery. In other words, this is a hybrid Li-ion/Li-O<sub>2</sub> cell. The concept of the hybrid Li-ion/Li-O<sub>2</sub> cell was first proposed by Thackeray et al., who used the high Li<sub>2</sub>O-containing metal oxides, such as Li<sub>5</sub>FeO<sub>4</sub>, to release the Li and O<sub>2</sub>(g) during charge and produced Li<sub>2</sub>O-metal oxide compounds during discharge.<sup>47–49</sup> In this case, a Li<sub>2</sub>O<sub>2</sub>-MoS<sub>2</sub> compound, Li<sub>2</sub>MoO<sub>2</sub>S<sub>2</sub>, is formed during discharge. It releases the Li and O<sub>2</sub>(g) during charge. When the discharge capacity is beyond the storage capability of MoS<sub>2</sub>, Li<sub>2</sub>O<sub>2</sub> will form as discharge products (Figure S3) and the cell will behave like a conventional Li-O<sub>2</sub> battery.

Considering the low polarization and high capacity, the rGO-MoS<sub>2</sub>-O<sub>2</sub> cell demonstrates a very promising prototype for constructing a useful hybrid Li-ion/Li-O<sub>2</sub> battery. The key is to find a suitable host, for example MoS<sub>2</sub>, which should meet the following criteria. (1) MoS<sub>2</sub> provides enough room to store the Li ions and O anions, forming the Li<sub>2</sub>MoO<sub>2</sub>S<sub>2</sub> compound. After activation, the maximum capacity of the hybrid rGO-MoS<sub>2</sub>-O<sub>2</sub> cell is about 1,000 mAh g<sup>-1</sup><sub>(MoS<sub>2</sub>)</sub> (Figure S15). (2) The oxidized MoS<sub>2</sub> has compatible working voltage window with Li<sub>2</sub>O<sub>2</sub>.<sup>50</sup> In contrast, the voltage hysteresis of Li<sub>5</sub>FeO<sub>4</sub> is as large as 2.0 V.<sup>47</sup> The large voltage mismatch will lead to much energy loss of the cell. (3) The structure of MoS<sub>2</sub> is robust for long-term use. It recovers after charge and remains stable for hundreds of cycles (Figure S11).

To facilitate the kinetic reactions, catalysts or redox mediators also work well in the hybrid Li-ion/Li-O<sub>2</sub> battery, such as Lil. Lil plays a vital role in the hybrid rGO-MoS<sub>2</sub>-O<sub>2</sub> cell. (1) Lil combines with O<sub>2</sub><sup>-</sup> to form IO<sup>-</sup>, promotes the dissolution of the O<sub>2</sub><sup>-</sup> into the electrolyte, and alters the reaction through solution. (2) IO<sup>-</sup> triggers oxidation of the MoS<sub>2</sub> and forms the Li<sub>2</sub>MoO<sub>2</sub>S<sub>2</sub> by oxyhalogen-sulfur electrochemistry. (3) Other iodine intermediates promote decomposition of Li<sub>2</sub>MoO<sub>2</sub>S<sub>2</sub>, which lowers the cell overpotential. (4) Lil also catalyzes the formation and decomposition of Li<sub>2</sub>O<sub>2</sub>.<sup>43</sup>

Compared with the conventional Li-O<sub>2</sub> battery, the hybrid Li-ion/Li-O<sub>2</sub> cell outperforms in several aspects: (1) low polarization; (2) the O anions are accommodated in the structure of the MoS<sub>2</sub>, which restricts the volume changes and eliminates the common clogging problem caused by unevenly accumulated Li<sub>2</sub>O<sub>2</sub>;<sup>51</sup> (3) the low charge voltage reduces the harmful coverage by side-products. In short, the hybrid Li-ion/Li-O<sub>2</sub> cell combines the advantages of Li-ion and Li-O<sub>2</sub> batteries, and shows promise in meeting future energy requirements.

The compound Li<sub>2</sub>MoO<sub>2</sub>S<sub>2</sub> is found to be isostructural to the Li<sub>2</sub>MoO<sub>4</sub> (Figure S5) rather than the other molybdenum oxysulfides A<sub>2</sub>MoO<sub>2</sub>S<sub>2</sub> (A = K, Rb, Cs, and NH<sub>4</sub>).<sup>52,53</sup> This is mostly due to the similar ionic size of the Li<sup>+</sup> (60 pm) and the Mo<sup>6+</sup> (62 pm) while other cations are very large (K<sup>+</sup> [133 pm], Rb<sup>+</sup> [148 pm], Cs<sup>+</sup> [169 pm], and (NH<sub>4</sub>)<sup>+</sup> [148 pm]). Therefore, both Mo and Li atoms can coordinate with the two O and two S atoms to form MoO<sub>2</sub>S<sub>2</sub> and LiO<sub>2</sub>S<sub>2</sub> tetrahedrons while other large cations require more anion atoms to form complex polyhedrons. This unique structure is expected to endow Li<sub>2</sub>MoO<sub>2</sub>S<sub>2</sub> with some interesting physical/chemical properties. The Li<sub>2</sub>MoO<sub>2</sub>S<sub>2</sub> can be obtained through both the electrochemical (in this case) and chemical reactions (Figure S16).

Since various species such as O<sub>2</sub>(g), MoS<sub>2</sub>(solid [s]), rGO(s), LiI(liquid [l]), H<sub>2</sub>O(l), and electrolyte(l) are integrated in one electrochemical system, a series of electrochemical and chemical reactions could occur besides the dominant reactions proposed above.<sup>34</sup> It is difficult to segregate each contribution because some of them are synergistic and require more characterizations and control experiments, which are beyond the scope of this paper. DME was used because it is more stable than other solvents, such as DMSO.<sup>54</sup> However, electrolyte decomposition was still found (Figure S12) and accumulation of the by-products such as Li<sub>2</sub>CO<sub>3</sub> will passivate the catalyst, block the reaction, and increase the polarization. Therefore, it is still challenging to clarify the complex mechanism and have a stable electrolyte for practical Li-O<sub>2</sub> battery.

In summary, based on the oxyhalogen-sulfur electrochemistry, a hybrid Li-ion/Li-O<sub>2</sub> battery was constructed, which combines the features of the Li-O<sub>2</sub> batteries and Li-ion batteries. Both Li ions and O anions can be reversibly stored in the MoS<sub>2</sub> structure, forming a Li<sub>2</sub>MoO<sub>2</sub>S<sub>2</sub> compound. The reaction mechanism was explained by using Raman spectroscopy, DEMS, XPS, XAS, and XRD. It was found that the dissolved O<sub>2</sub><sup>-</sup> combines with I<sup>-</sup> to oxidize MoS<sub>2</sub>, which allows Li<sup>+</sup> intercalation into the MoS<sub>2</sub> structure. The integrated MoS<sub>2</sub> is oxidized upon the discharge state and recovered upon the charge state.

We have attempted chemical synthesis to isolate Li<sub>2</sub>MoO<sub>2</sub>S<sub>2</sub> without any success, as it is the first time the compound has been observed in an electrochemical system. More fundamental study is needed to explore its physical/(electro)chemical properties.

## EXPERIMENTAL PROCEDURES

Full experimental procedures are provided in the [Supplemental Information](#).

## SUPPLEMENTAL INFORMATION

Supplemental Information includes Supplemental Experimental Procedures, 16 figures, and 1 table and can be found with this article online at <https://doi.org/10.1016/j.joule.2018.07.019>.

## ACKNOWLEDGMENTS

We acknowledge the use of the University of California, San Diego Cryo-Electron Microscopy Facility, which is supported by NIH grants to Dr. Timothy S. Baker and a gift from the Agouron Institute to UCSD. The scanning EM was performed in part at the San Diego Nanotechnology Infrastructure (SDNI), a member of the National Nanotechnology Coordinated Infrastructure, which is supported by the National Science Foundation (grant ECCS-1542148). XPS work was performed at the University of California, Irvine Materials Research Institute using instrumentation funded in part by the National Science Foundation Major Research Instrumentation Program under grant no. CHE-1338173. We thank the Advanced Photon Source for the synchrotron X-ray diffractions (beamline 11-BM) and XAS (beamline 20-BM) at the Argonne National Laboratory. X.W. appreciates the discussion and help from Dr. Yurui Gao and Dr. Longfei Wang. M.S. acknowledges Qualcomm Company for the use of scanning transmission electron microscopy facilities. We are grateful for financial support from the Assistant Secretary for Energy Efficiency and Renewable Energy, Office of Vehicle Technologies of the US Department of Energy under the Battery500 Consortium. Partial funding is provided by Assistant Secretary for Energy Efficiency and Renewable Energy, Office of Vehicle Technologies of the US Department of Energy under contract no. DE-AC02-05CH11231, subcontract no. 7073923, under the Advanced Battery Materials Research Program.

## AUTHOR CONTRIBUTIONS

X.W. conceived the idea, designed the experiments, and conducted most of the characterizations. Y.L. and B.L. helped to synthesize the materials. Y.L. performed the density functional theory calculations. X.B. and J.L. carried out the DEMS. L.M. and T.W. performed the XAS. M.S. conducted the scanning transmission electron microscopy. S.W. helped with UV. X.W., J.L., and Y.S.M. analyzed the experimental and computational data together. All authors (the aforementioned and M.Z., J.A., A.B., and K.A.) discussed the results and commented on the manuscript. The manuscript was written through contributions of all authors. All authors have given approval of the final version of the manuscript.

## DECLARATION OF INTERESTS

X.W. and Y.S.M. are the inventors on a US provisional invention disclosure related to this work.

Received: February 17, 2018

Revised: May 30, 2018

Accepted: July 19, 2018

Published: August 9, 2018

## REFERENCES

- Novoselov, K.S. (2004). Electric field effect in atomically thin carbon films. *Science* 306, 666–669.
- Filhol, J.S., Combelle, C., Yazami, R., and Doublet, M.L. (2008). Phase diagrams for systems with low free energy variation: a coupled theory/experiments method applied to Li-graphite. *J. Phys. Chem. C* 112, 3982–3988.
- Berthelot, R., Carlier, D., and Delmas, C. (2011). Electrochemical investigation of the P<sub>2</sub>-Na<sub>x</sub>CoO<sub>2</sub> phase diagram. *Nat. Mater.* 10, 74–80.
- Lu, J.C., Chung, S.C., Nishimura, S., and Yamada, A. (2013). Phase diagram of olivine Na<sub>x</sub>FePO<sub>4</sub> (0 < x < 1). *Chem. Mater.* 25, 4557–4565.
- Zhang, J., Ma, Z., Yuan, X., Li, L., Ma, Z.-F., Wilkinson, D.P., and Zhang, L. (2015). A review of cathode materials and structures for rechargeable lithium-air batteries. *Energy Environ. Sci.* 8, 2144–2198.
- Feng, N., He, P., and Zhou, H. (2016). Critical challenges in rechargeable aprotic Li-O<sub>2</sub> batteries. *Adv. Energy Mater.* 6, 1502303.
- Aurbach, D., McCloskey, B.D., Nazar, L.F., and Bruce, P.G. (2016). Advances in understanding mechanisms underpinning lithium-air batteries. *Nat. Energy* 1, 16128.
- Johnson, L., Li, C., Liu, Z., Chen, Y., Freunberger, S.A., Ashok, P.C., Praveen, B.B., Dholakia, K., Tarascon, J.M., Bruce, P.G., et al. (2014). The role of LiO<sub>2</sub> solubility in O<sub>2</sub> reduction in aprotic solvents and its

- consequences for Li-O<sub>2</sub> batteries. *Nat. Chem.* **6**, 1091–1099.
9. Gao, X., Chen, Y., Johnson, L., and Bruce, P.G. (2016). Promoting solution phase discharge in Li-O<sub>2</sub> batteries containing weakly solvating electrolyte solutions. *Nat. Mater.* **15**, 882–888.
10. Lu, J., Lee, Y.J., Luo, X., Lau, K.C., Asadi, M., Wang, H.H., Brombosz, S., Wen, J., Zhai, D., Chen, Z., et al. (2016). A lithium-oxygen battery based on lithium superoxide. *Nature* **529**, 377–382.
11. Liu, T., Leskes, M., Yu, W., Moore, A.J., Zhou, L., Bayley, P.M., Kim, G., and Grey, C.P. (2015). Cycling Li-O<sub>2</sub> batteries via LiOH formation and decomposition. *Science* **350**, 530–533.
12. Burke, C.M., Black, R., Kochetkov, I.R., Giordani, V., Addison, D., Nazar, L.F., and McCloskey, B.D. (2016). Implications of 4 e<sup>-</sup> oxygen reduction via iodide redox mediation in Li-O<sub>2</sub> batteries. *ACS Energy Lett.* **1**, 747–756.
13. Shen, Y., Zhang, W., Chou, S.-L., and Dou, S.-X. (2016). Comment on “cycling Li-O<sub>2</sub> batteries via LiOH formation and decomposition”. *Science* **352**, 667.
14. Viswanathan, V., Pande, V., Abraham, K.M., Luntz, A.C., McCloskey, B.D., and Addison, D. (2016). Comment on “cycling Li-O<sub>2</sub> batteries via LiOH formation and decomposition”. *Science* **352**, 667.
15. Muller, A. (1986). Coordination chemistry of Mo- and WS compounds and some aspects of hydrodesulfurization catalysis. *Polyhedron* **5**, 323–340.
16. Byskov, L.S., Nørskov, J.K., Clausen, B.S., and Topsøe, H. (1999). DFT calculations of unpromoted and promoted MoS<sub>2</sub>-based hydrodesulfurization catalysts. *J. Catal.* **187**, 109–122.
17. Li, Y., Li, Y.-L., Araujo, C.M., Luo, W., and Ahuja, R. (2013). Single-layer MoS<sub>2</sub> as an efficient photocatalyst. *Catal. Sci. Technol.* **3**, 2214–2220.
18. Parzinger, E., Miller, B., Blaschke, B., Garrido, J.A., Ager, J.W., Holleitner, A., and Wurstbauer, U. (2015). Photocatalytic stability of single- and few-layer MoS<sub>2</sub>. *ACS Nano* **9**, 11302–11309.
19. Wang, H., Lu, Z., Xu, S., Kong, D., Cha, J.J., Zheng, G., Hsu, P.C., Yan, K., Bradshaw, D., Prinz, F.B., Cui, Y., et al. (2013). Electrochemical tuning of vertically aligned MoS<sub>2</sub> nanofilms and its application in improving hydrogen evolution reaction. *Proc. Natl. Acad. Sci. USA* **110**, 19701–19706.
20. Zhang, L., Wu, H.B., Yan, Y., Wang, X., and Lou, X.W. (2014). Hierarchical MoS<sub>2</sub> microboxes constructed by nanosheets with enhanced electrochemical properties for lithium storage and water splitting. *Energy Environ. Sci.* **7**, 3302–3306.
21. Li, H., Du, M., Mleczko, M.J., Koh, A.L., Nishi, Y., Pop, E., Bard, A.J., and Zheng, X. (2016). Kinetic Study of hydrogen evolution reaction over strained MoS<sub>2</sub> with sulfur vacancies using scanning electrochemical microscopy. *J. Am. Chem. Soc.* **138**, 5123–5129.
22. Benavente, E., Santa Ana, M.A., Mendizábal, F., and González, G. (2002). Intercalation chemistry of molybdenum disulfide. *Coord. Chem. Rev.* **224**, 87–109.
23. Huang, X., Zeng, Z., and Zhang, H. (2013). Metal dichalcogenide nanosheets: preparation, properties and applications. *Chem. Soc. Rev.* **42**, 1934–1946.
24. Jaramillo, T.F., Jorgensen, K.P., Bonde, J., Nielsen, J.H., Horch, S., and Chorkendorff, I. (2007). Identification of active edge sites for electrochemical H<sub>2</sub> evolution from MoS<sub>2</sub> nanocatalysts. *Science* **317**, 100–102.
25. Kibsgaard, J., Chen, Z., Reinecke, B.N., and Jaramillo, T.F. (2012). Engineering the surface structure of MoS<sub>2</sub> to preferentially expose active edge sites for electrocatalysis. *Nat. Mater.* **11**, 963–969.
26. Wieting, T.J., and Verble, J.L. (1971). Infrared and Raman studies of long-wavelength optical phonons in hexagonal MoS<sub>2</sub>. *Phys. Rev. B* **3**, 4286–4292.
27. Gittleston, F.S., Ryu, W.-H., and Taylor, A.D. (2014). Operando observation of the gold–electrolyte interface in Li-O<sub>2</sub> batteries. *ACS Appl. Mater. Interfaces* **6**, 19017–19025.
28. Gittleston, F.S., Yao, K.P.C., Kwabi, D.G., Sayed, S.Y., Ryu, W.-H., Shao-Horn, Y., and Taylor, A.D. (2015). Raman spectroscopy in lithium-oxygen battery systems. *ChemElectrochem.* **2**, 1446–1457.
29. Barinova, O., Kirsanova, S., Sadovskiy, A., and Avetissov, I. (2014). Properties of Li<sub>2</sub>MoO<sub>4</sub> single crystals grown by Czochralski technique. *J. Cryst. Growth* **401**, 853–856.
30. Lin-Vien, D., Colthup, N.B., Fateley, W.G., and Grasselli, J.G. (1991). Organic sulfur compounds. In *The Handbook of Infrared and Raman Characteristic Frequencies of Organic Molecules* (Academic Press), pp. 225–250.
31. Lindberg, B.J., Hamrin, K., Johansson, G., Gelius, U., Fahlman, A., Nordling, C., and Siegbahn, K. (1970). Molecular spectroscopy by means of ESCA II. Sulfur compounds. Correlation of electron binding energy with structure. *Phys. Scr.* **1**, 286.
32. Mundoma, C., and Simoyi, R.H. (1997). Oxyhalogen-sulfur chemistry Oxidation of 2-aminoethanethiolsulfuric acid by iodate in acidic medium. *J. Chem. Soc. Faraday Trans.* **93**, 1543–1550.
33. Chikwana, E., Davis, B., Morakinyo, M.K., and Simoyi, R.H. (2009). Oxyhalogen-sulfur chemistry—kinetics and mechanism of oxidation of methionine by aqueous iodine and acidified iodate. *Can. J. Chem.* **87**, 689–697.
34. Qiao, Y., Wu, S., Sun, Y., Guo, S., Yi, J., He, P., and Zhou, H. (2017). Unraveling the complex role of iodide additives in Li-O<sub>2</sub> batteries. *ACS Energy Lett.* **1**, 1869–1878.
35. Durig, J.R., Bonner, O.D., and Breazeale, W.H. (1965). Raman studies of iodic acid and sodium iodate. *J. Phys. Chem.* **69**, 3886–3892.
36. Haimovich, O., and Treinin, A. (1965). Electronic spectrum of IO<sup>-</sup> in solution. *Nature* **207**, 185–186.
37. Paquette, J., and Ford, B.L. (1985). Iodine chemistry in the +1 oxidation state. I. The electronic spectra of IO<sup>-</sup>, HOI, and H<sub>2</sub>OI<sup>+</sup>. *Can. J. Chem.* **63**, 2444–2448.
38. Wren, J.C., Paquette, J., Sunder, S., and Ford, B.L. (1986). Iodine chemistry in the +1 oxidation state. II. A Raman and UV-visible spectroscopic study of the disproportionation of hypoiodite in basic solutions. *Can. J. Chem.* **64**, 2284–2296.
39. Matsui, M., Wada, A., Matsuda, Y., Yamamoto, O., Takeda, Y., and Imanishi, N. (2015). A novel aqueous lithium-oxygen cell based on the oxygen-peroxide redox couple. *Chem. Commun.* **51**, 3189–3192.
40. Liu, T., Kim, G., Carretero-González, J., Castillo-Martínez, E., and Grey, C.P. (2016). Response to comment on “cycling Li-O<sub>2</sub> batteries via LiOH formation and decomposition”. *Science* **352**, 667.
41. Furrow, S. (1987). Reactions of iodine intermediates in iodate-hydrogen peroxide oscillators. *J. Phys. Chem.* **91**, 2129–2135.
42. Liebhfafsky, H.A., and Wu, L.S. (1974). Reactions involving hydrogen peroxide, iodine, and iodate ion. V. Introduction to the oscillatory decomposition of hydrogen peroxide. *J. Am. Chem. Soc.* **96**, 7180–7187.
43. Nakanishi, A., Thomas, M.L., Kwon, H.-M., Kobayashi, Y., Tatara, R., Ueno, K., Dokko, K., and Watanabe, M. (2018). Electrolyte composition in Li/O<sub>2</sub> batteries with Lil redox mediators: solvation effects on redox potentials and implications for redox shuttling. *J. Phys. Chem. C* **122**, 1522–1534.
44. Erickson, B.E., and Helz, G.R. (2000). Molybdenum(VI) speciation in sulfidic waters: stability and lability of thiomolybdates. *Geochim. Cosmochim. Acta* **64**, 1149–1158.
45. Harmer, M.A., and Sykes, A.G. (1980). Kinetics of the interconversion of sulfido- and oxomolybdate(VI) species MoO<sub>4</sub>S<sub>4-x</sub><sup>2-</sup> in aqueous solutions. *Inorg. Chem.* **19**, 2881–2885.
46. Prasad, T.P., Diemann, E., and Müller, A. (1973). Thermal decomposition of (NH<sub>4</sub>)<sub>2</sub>MoO<sub>2</sub>S<sub>2</sub>, (NH<sub>4</sub>)<sub>2</sub>MoS<sub>4</sub>, (NH<sub>4</sub>)<sub>2</sub>WO<sub>2</sub>S<sub>2</sub> and (NH<sub>4</sub>)<sub>2</sub>WS<sub>4</sub>. *J. Inorg. Nucl. Chem.* **35**, 1895–1904.
47. Trahey, L., Johnson, C.S., Vaughey, J.T., Kang, S.-H., Hardwick, L.J., Freunberger, S.A., Bruce, P.G., and Thackeray, M.M. (2011). Activated lithium-metal-oxides as catalytic electrodes for Li-O<sub>2</sub> cells. *Electrochem. Solid State Lett.* **14**, A64–A66.
48. Thackeray, M.M., Chan, M.K.Y., Trahey, L., Kirklin, S., and Wolverton, C. (2013). Vision for designing high-energy, hybrid Li ion/Li-O<sub>2</sub> cells. *J. Phys. Chem. Lett.* **4**, 3607–3611.
49. Park, K.H., Bai, Q., Kim, D.H., Oh, D.Y., Zhu, Y., Mo, Y., and Jung, Y.S.. Design strategies, practical considerations, and new solution processes of sulfide solid electrolytes for all-solid-state batteries. *Adv. Energy Mater.* <https://doi.org/10.1002/aenm.201800035>.
50. Abraham, K.M., Pasquariello, D.M., and Willstaedt, E.B. (1989). Lithium/molybdenum oxysulfide secondary batteries. *J. Electrochem. Soc.* **136**, 576–577.
51. Lim, H.-D., Park, K.Y., Song, H., Jang, E.Y., Gwon, H., Kim, J., Kim, Y.H., Lima, M.D., Ovalle

- Robles, R., and Lepró, X. (2012). Enhanced power and rechargeability of a Li-O<sub>2</sub> battery based on a hierarchical-fibril CNT electrode. *Adv. Mater.* 25, 1348–1352.
52. Müller, A., Diemann, E., and Baran, E.J. (1970). Übergangsmetallchalkogenverbindungen. über dithiomolybdate und -wolframate (NH<sub>4</sub>)<sub>2</sub>MoO<sub>2</sub>S<sub>2</sub> und (NH<sub>4</sub>)<sub>2</sub>WO<sub>2</sub>S<sub>2</sub>, Verbindungen mit starken Wasserstoffbrücken. *Z. Anorg. Allg. Chem.* 375, 87–97.
53. Tsigdinos, G.A. (1978). Inorganic sulfur compounds of molybdenum and tungsten. In *Topics in Current Chemistry: Aspects of Molybdenum and Related Chemistry*, G.A. Tsigdinos and G.H. Moh, eds. (Springer), pp. 65–105.
54. Khetan, A., Luntz, A., and Viswanathan, V. (2015). Trade-offs in capacity and rechargeability in nonaqueous Li-O<sub>2</sub> batteries: solution-driven growth versus nucleophilic stability. *J. Phys. Chem. Lett.* 6, 1254–1259.

**JOUL, Volume 2**

**Supplemental Information**

**Hybrid Li-Ion and Li-O<sub>2</sub> Battery Enabled**

**by Oxyhalogen-Sulfur Electrochemistry**

**Xuefeng Wang, Yejing Li, Xuanxuan Bi, Lu Ma, Tianpin Wu, Mahsa Sina, Shen Wang, Minghao Zhang, Judith Alvarado, Bingyu Lu, Abhik Banerjee, Khalil Amine, Jun Lu, and Ying Shirley Meng**

# Supplementary information

## **Materials and methods:**

**Materials:** All the chemicals were bought from Sigma Aldrich. The anhydrous 1,2-Dimethoxyethane (DME, for HPLC, 99.9%, inhibitor-free), lithium bis(trifluoromethyl) sulfonylimide (LiTFSI), lithium iodide (LiI) and dimethyl carbonate (DMC) were stored in the Ar filled glovebox ( $O_2 < 0.1$  ppm, and  $H_2O < 0.1$  ppm). DME was further dried by the molecular sieves.

**Synthesis of reduced graphene oxide (rGO):** The rGO was prepared by a modified Hummer's method. The graphite (2 g) was oxidized by the concentrated  $H_2SO_4$  (80 mL),  $HNO_3$  (60 mL) and  $KMnO_4$  (12 g). The mixture solution was continuously stirred at  $0\text{ }^\circ\text{C}$  for 1 hour and then at room temperature for another 24 h after adding 200 mL  $H_2O$ . 10 mL  $H_2O_2$  (30%) was introduced into the solution and the color of the suspension was changed from brown to yellow. The graphene oxides (GO) were repeatedly washed with  $H_2O$  by centrifuging, then dispersed in  $H_2O$  by ultrasonication and finally freeze-dried for 3 days. The rGO electrode was made by casting the GO slurry onto a stainless-steel mesh (SSM, Alfa, 325 mesh woven from 0.036 mm diameter wire), freeze-drying and reducing at  $550\text{ }^\circ\text{C}$  for 2 hours in the Ar flowing tube furnace.

**Synthesis of rGO-MoS<sub>2</sub>:** The free-standing rGO-MoS<sub>2</sub> electrode was obtained by directly growing the rGO-MoS<sub>2</sub> sheets on the SSM via hydrothermal reaction. The mixture solution of GO (5 mg), MoO<sub>3</sub> (30 mg), triacetamide (35 mg), urea (300 mg), ethanol (50 mL) and  $H_2O$  (30 mL) and SSM were putted into a 100 mL autoclave and hydrothermally treated at  $200\text{ }^\circ\text{C}$  for 24 hours. The yielded rGO-MoS<sub>2</sub> on SSM was washed and freeze-dried. Pure MoS<sub>2</sub> electrode was obtained as the same procedure but without rGO additive. The average loading of the active material on an electrode (diameter 13 mm) is about 0.2 mg.

**Preparation of the commercial MoS<sub>2</sub> electrode:** Commercial MoS<sub>2</sub>, Super P carbon and polyvinylidene fluoride (PVDF) were mixed together at a weight ratio of 8:1:1 with N-Methyl-2-pyrrolidone (NMP) solvent and casted on the SSM. The loading of the MoS<sub>2</sub> is about 1.6 mg.

**Cell assembly and electrochemical evaluation:** Coin cells (R2032 for air batteries, MTI corporation) were assembled with a disc of lithium foil (1mm thickness, FMC), 500  $\mu\text{L}$  electrolyte, two pieces of glass fiber separator (Whatman, grade GF/D),  $O_2$  electrode and Ni foam (act as  $O_2$  diffusion layer and electrons-transfer layer, MTI corporation). The electrolytes were 0.25 mol/L LiTFSI/DME with/without 50 mmol/L LiI. The

assembled coin cells were placed in the O<sub>2</sub> filled container and electrochemically tested at galvanostatic mode for the same discharge/charge time by LanHe battery cycler (Wuhan, China). All potentials are referenced against Li/Li<sup>+</sup>. The electrochemical performance was reproduced for at least twice, especially for rGO-MoS<sub>2</sub> with LiI.

### **Electrode Characterization:**

All the cycled samples were taken out from the batteries, rinsed with DMC, stored in the glovebox and tested in the dry atmosphere.

The TEM samples were loaded on lacy carbon grid and performed at a FEI-Tecnai Osiris microscope (200 kV) equipped with Super-X EDS detection system.

Synchrotron X-ray diffractions were taken at the Advanced Photon Source (APS) at Argonne National Laboratory (ANL) on beamline 11-BM ( $\lambda = 0.4145 \text{ \AA}$ ). The beamline uses a sagittal focused X-ray beam with a high precision diffractometer circle and perfect Si (111) crystal analyzer detection for high sensitivity and resolution. XRD patterns were analyzed by the Rietveld refinement method using TOPAS software.

XPS was performed using a Kratos Ultra DLD XPS. All spectra were calibrated with C 1s (284.8 eV) of the adventitious carbon in the chamber. The sum of the areas under the peaks were then used to determine relative ratio of different states.

Raman system (Renishaw inVia/Bruker Innova) was used with 514 nm illumination, which was provided by a Modu-Laser 50 mW Ar<sup>+</sup> ion laser. The procedure used the 10% power and five accumulation time.

The XANES and EXAFS measurements at Mo K-edges were performed at the Advanced Photon Source (APS) on the bending-magnet beamline 20-BM-B with electron energy of 7 GeV and average current of 100 mA. The radiation was monochromatized by a Si (111) double-crystal monochromator. Harmonic rejection was accomplished with 15% detune. All spectra of samples were collected in fluorescence mode by PIPS detector. For energy calibration, the first derivative peak of Mo foil was adjusted to 20000 eV. Data reduction and analysis were processed by Athena software.

Scanning electron microscopic (SEM) images were recorded with Zeiss Sigma 500 Field-emission scanning electron microscopy (FESEM) on a JEOL JSM-6700F operating at 10 kV.

The differential electrochemical mass spectrometry was built based on a purchased mass spectrometer (HPR-40, Hiden Analytical). The volumes of the cell head space, the transfer line, and the sample cross were all



calibrated by known volume tubings. The mass spectrometer was calibrated by standard mixture gas of CO<sub>2</sub>, O<sub>2</sub>, and H<sub>2</sub> (2%, 5%, and 10%) in Ar. The discharge process was performed by flowing oxygen in the cell and monitoring the oxygen consumption by pressure transducer (PX419-USBH). After discharge, all the gas leftover in the cell was tested by the mass spectrometer and no other gas was detected. Hence, we assume that only oxygen participates in the electrochemical reaction and the change of pressure is only related to the change of oxygen in the cell. The charge process was tested by injecting the gas generated from the cell every 10 min to the mass spectrometer.

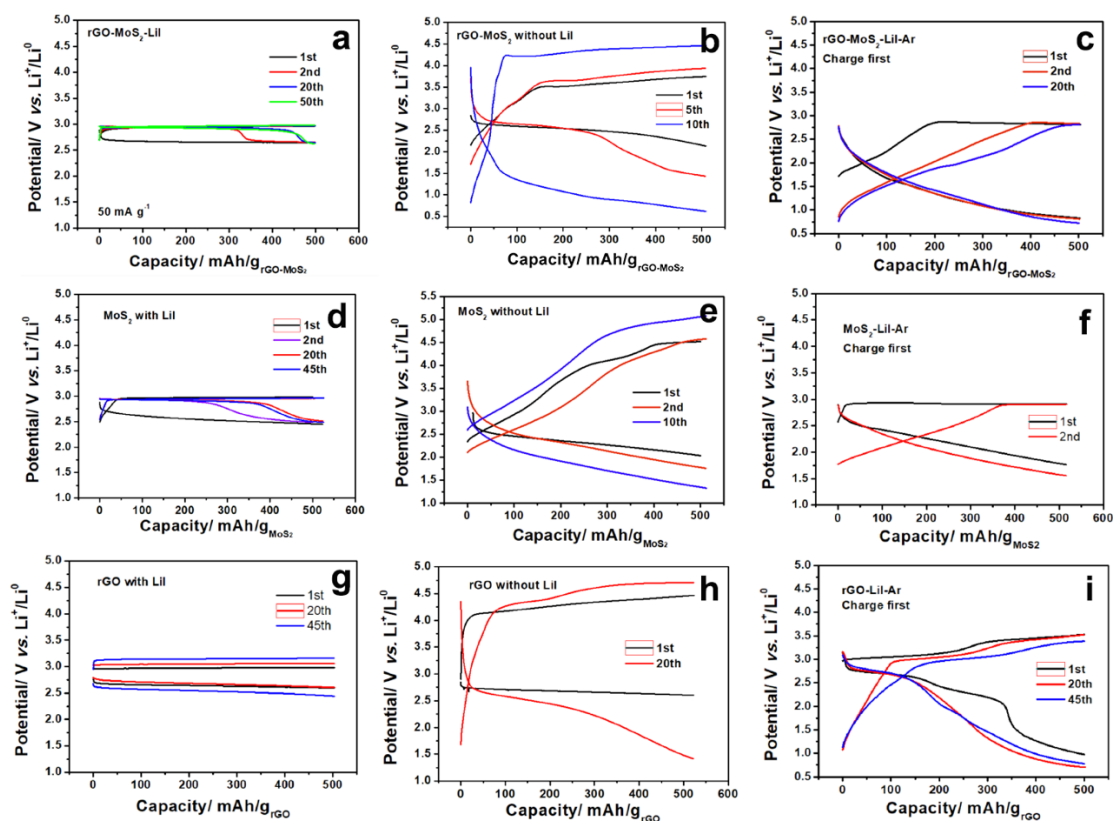

**Figure S1.** Potential curves of the rGO-MoS<sub>2</sub> (a-c), MoS<sub>2</sub> (d-f) and rGO (g-f) with (a, d and g)/without (b, e and h) LiI for Li-O<sub>2</sub> and Li-ion batteries (c, f and i): a) rGO-MoS<sub>2</sub> with LiI for Li-O<sub>2</sub> battery; b) rGO-MoS<sub>2</sub> without LiI for Li-O<sub>2</sub> battery; c) rGO-MoS<sub>2</sub> with LiI for Li-ion battery; d) MoS<sub>2</sub> with LiI for Li-O<sub>2</sub> battery; e) MoS<sub>2</sub> without LiI for Li-O<sub>2</sub> battery; f) MoS<sub>2</sub> with LiI for Li-ion battery; g) rGO with LiI for Li-O<sub>2</sub> battery; h) rGO without LiI for Li-O<sub>2</sub> battery; i) rGO with LiI for Li-ion battery;. 500  $\mu$ L electrolyte and 50 mA/g current density is used in all cells. The distinctive potential curves between the rGO and MoS<sub>2</sub> with LiI demonstrate different reactions occur in these two cells rather than the Li-I reaction.

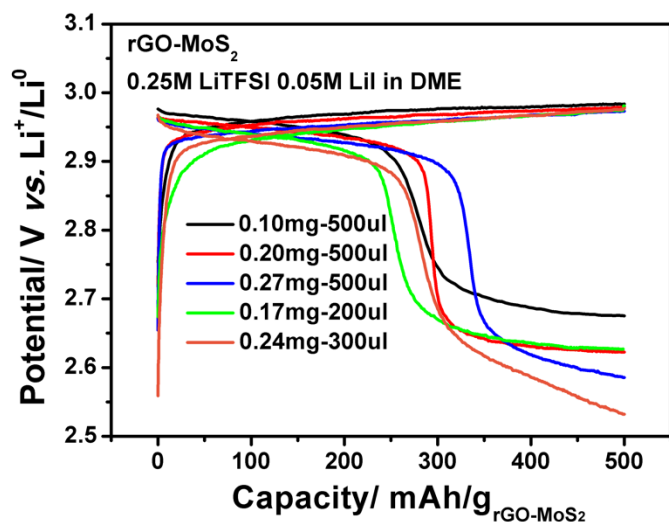

**Figure S2.** Potential curves of rGO-MoS<sub>2</sub> with different active material loading and electrolyte amount at the second cycle.

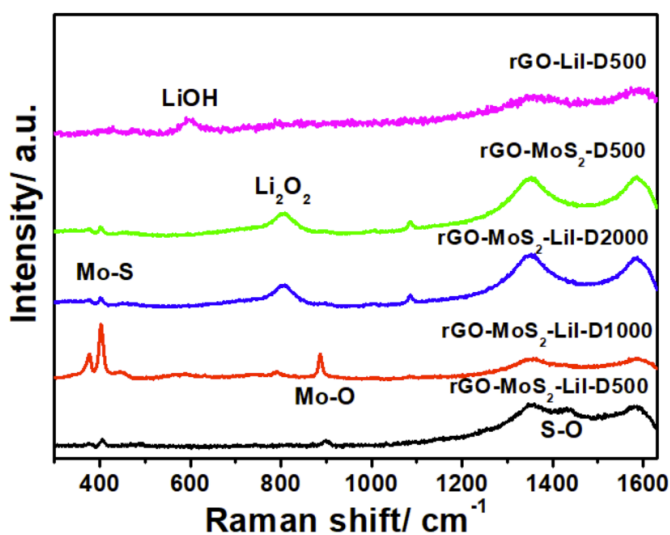

**Figure S3.** Raman spectra of the varied discharge samples, obtained from different conditions. After discharge to 500 mAh g<sup>-1</sup>, rGo-MoS<sub>2</sub> with LiI forms the Li<sub>2</sub>MoO<sub>2</sub>S<sub>2</sub> and absence of one of them will result in LiOH and Li<sub>2</sub>O<sub>2</sub>. Li<sub>2</sub>O<sub>2</sub> will show up and become dominated products when the rGo-MoS<sub>2</sub> was further discharged to 1000 and 2000 mAh g<sup>-1</sup>.

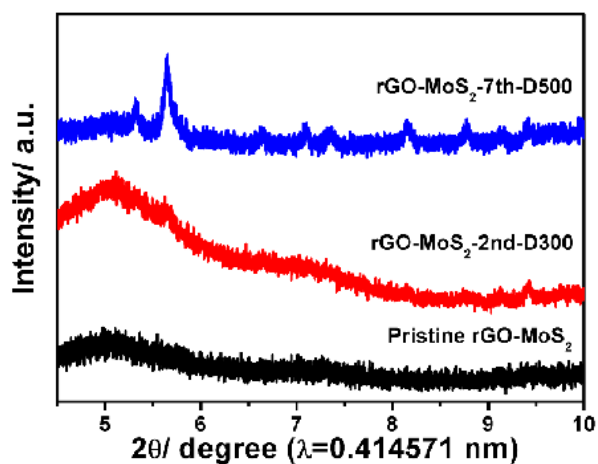

**Figure S4.** Synchrotron XRD results of pristine, discharged to 300 mAh g<sup>-1</sup> at the 2nd cycle and discharged to 500 mAh g<sup>-1</sup> at the 7th cycle rGO-MoS<sub>2</sub>. A new set of diffraction peaks appears after discharging to 300 mAh g<sup>-1</sup> at the 2nd cycle and becomes obvious after discharging to 500 mAh g<sup>-1</sup> at the 7th cycle.

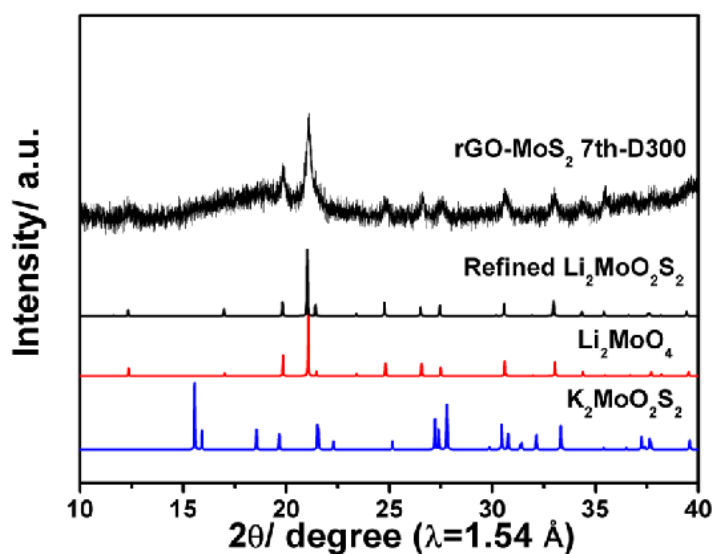

**Figure S5.** Compared the experimental and refined Li<sub>2</sub>MoO<sub>2</sub>S<sub>2</sub> patterns with the standard XRD pattern of the Li<sub>2</sub>MoO<sub>4</sub> and K<sub>2</sub>MoO<sub>2</sub>S<sub>2</sub>. The latter two patterns are from the ICSD database.

**Table S1.** The structure information of the  $\text{Li}_2\text{MoO}_2\text{S}_2$ , which is obtained by XRD refinement.

| Structure 1                         |    |                                     |         |         |      |          |         |
|-------------------------------------|----|-------------------------------------|---------|---------|------|----------|---------|
| Phase name                          |    | $\text{Li}_2\text{MoO}_2\text{S}_2$ |         |         |      |          |         |
| Space group                         |    | R-3H                                |         |         |      |          |         |
| Cell Volume ( $\text{\AA}^3$ )      |    | 1713.0(14)                          |         |         |      |          |         |
| Wt% - Rietveld                      |    | 100.000                             |         |         |      |          |         |
| Crystal Density ( $\text{g/cm}^3$ ) |    | 3.5937(29)                          |         |         |      |          |         |
| Lattice parameters                  |    |                                     |         |         |      |          |         |
| a ( $\text{\AA}$ )                  |    | 14.3585(47)                         |         |         |      |          |         |
| c ( $\text{\AA}$ )                  |    | 9.5939(43)                          |         |         |      |          |         |
|                                     |    |                                     |         |         |      |          |         |
| Site                                | Np | x                                   | y       | z       | Atom | Occ      | Beq     |
| Li1                                 | 18 | 0.14110                             | 0.45500 | 0.25320 | Li+1 | 1        | 0.0166  |
| Li2                                 | 18 | 0.30900                             | 0.85620 | 0.58230 | Li+1 | 1        | 0.0174  |
| Mo1                                 | 18 | 0.11834                             | 0.64730 | 0.41611 | Mo+6 | 1        | 0.01032 |
| O1                                  | 18 | 0.00523                             | 0.66467 | 0.41520 | O-2  | 1.00(11) | 0.0157  |
| O2                                  | 18 | 0.23365                             | 0.77686 | 0.41607 | O-2  | 1.00(11) | 0.0176  |
| S1                                  | 18 | 0.11925                             | 0.57890 | 0.26342 | S    | 1.00(18) | 0.0162  |
| S2                                  | 18 | 0.11907                             | 0.57810 | 0.56859 | S    | 1.00(13) | 0.0162  |

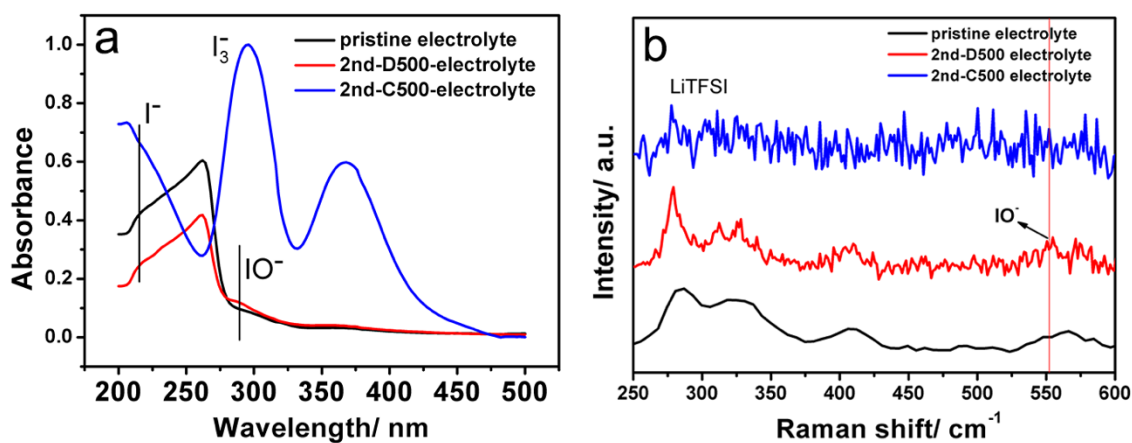

Figure S6. UV spectra (a) and Raman spectra (b) of the pristine, after 2<sup>nd</sup> discharge and charge electrolytes.

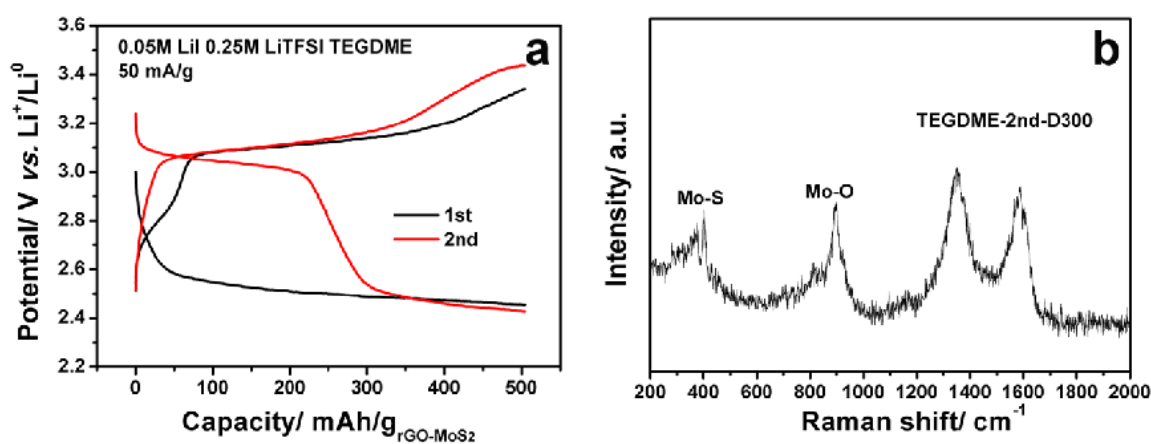

Figure S7. Potential curves (a) of rGO-MoS<sub>2</sub> at the first two cycles and Raman spectrum (b) of the discharged sample to 300 mAh g<sup>-1</sup> at the second cycle the when TEGDME replaces the DME in the electrolyte. The results show that rGO-MoS<sub>2</sub> shows the similar behavior.

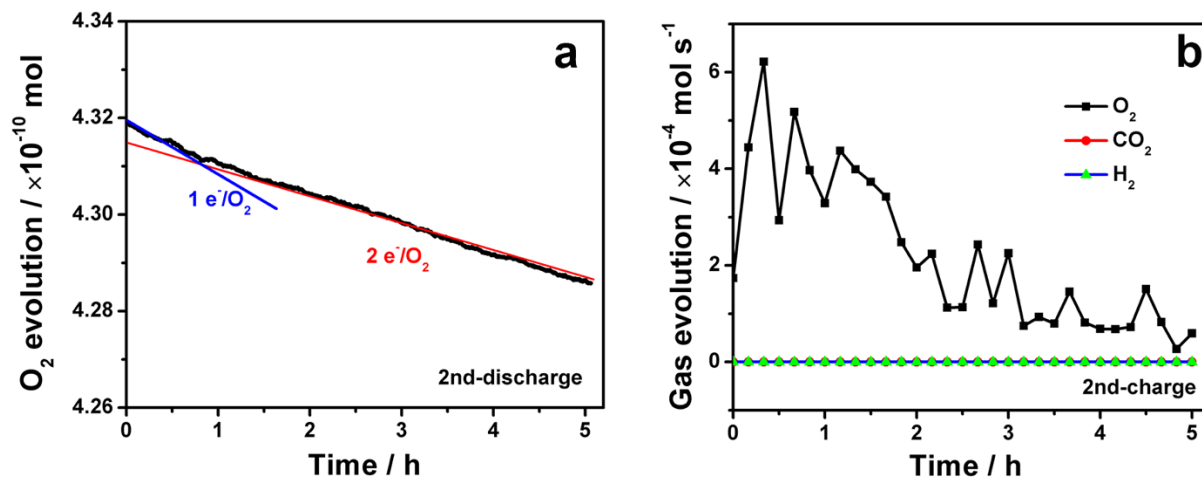

Figure S8. DEMS spectra during 2nd discharge (a) and charge (b) states.

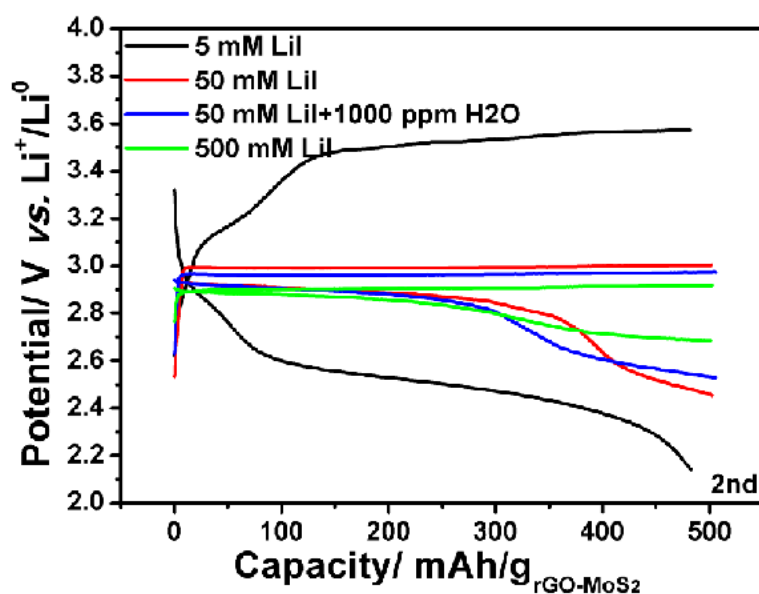

Figure S9. Potential curve of the rGO-MoS<sub>2</sub> at the second cycle with different concentration of LiI and H<sub>2</sub>O in the electrolyte. Increasing the LiI and H<sub>2</sub>O content is beneficial for reducing the polarization of the cell.

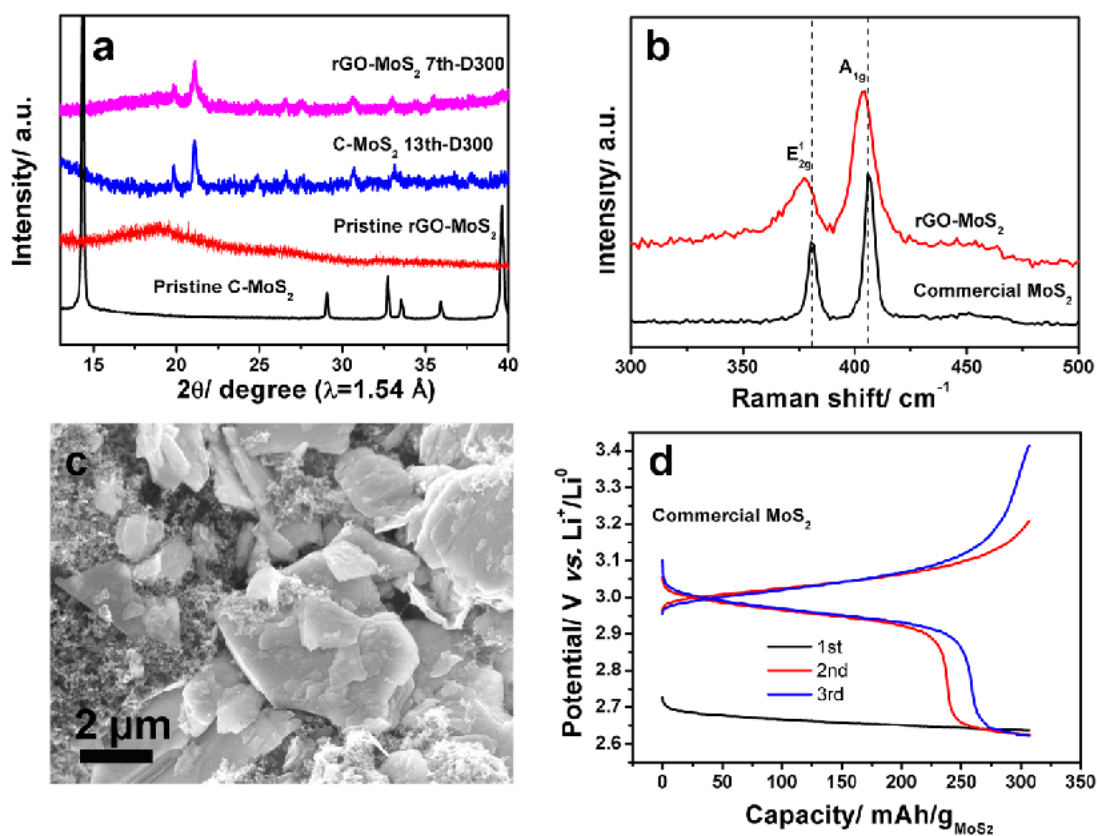

**Figure S10.** Feasibility of the commercial MoS<sub>2</sub>. The compared XRD patterns (a) and Raman spectra (b) between home-made rGO-MoS<sub>2</sub> and commercial MoS<sub>2</sub>, SEM images (c) and potential profiles of commercial MoS<sub>2</sub> electrode for Li-O<sub>2</sub> batteries with LiI in the electrolyte. Compared with home-made rGO-MoS<sub>2</sub>, commercial MoS<sub>2</sub> is well crystallized (a) and has larger particle size (c) and narrower interlayer since its Raman peaks shift to the high wavelength (b). Nevertheless, the commercial MoS<sub>2</sub> exhibits the similar electrochemical behavior (d) and gets Li<sub>2</sub>MoO<sub>2</sub>S<sub>2</sub> as discharge product (a) of the cell.

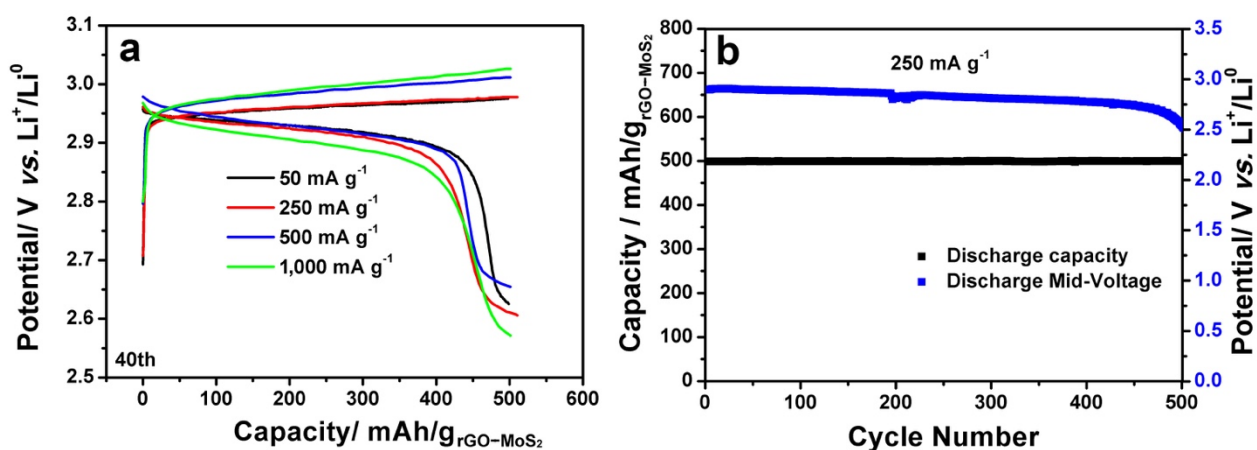

**Figure S11.** Rate and long cycling performance of the rGO-MoS<sub>2</sub> for Li-O<sub>2</sub> batteries with LiI. (a) The charge and discharge potential curves at the 40<sup>th</sup> cycle with the different rates. The 40<sup>th</sup> cycle is selected because most capacity is associated with the formation of Li<sub>2x</sub>MoO<sub>2x</sub>S<sub>2</sub>. (b) The evolution of the discharge capacity and mid-voltage as a function of the cycling number at 250 mA g<sup>-1</sup>.

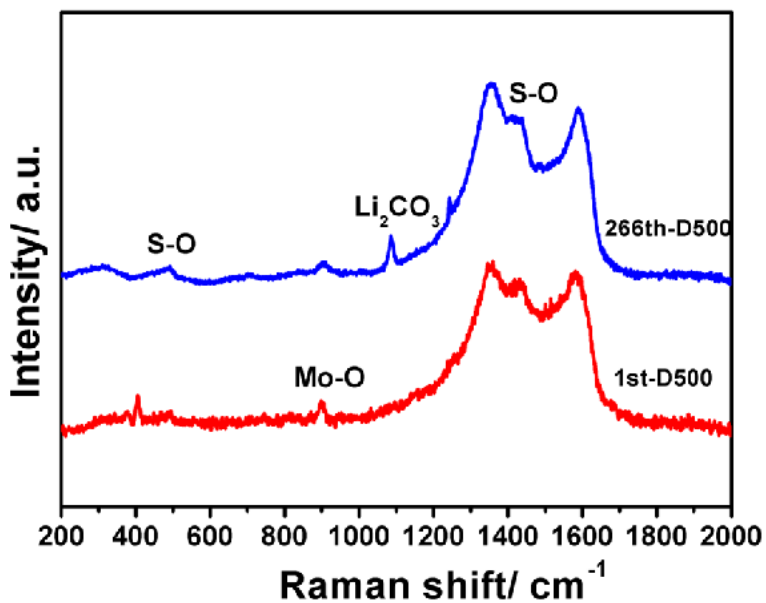

**Figure S12.** Compared Raman spectra of the discharge samples between 1 cycle and 266 cycles.

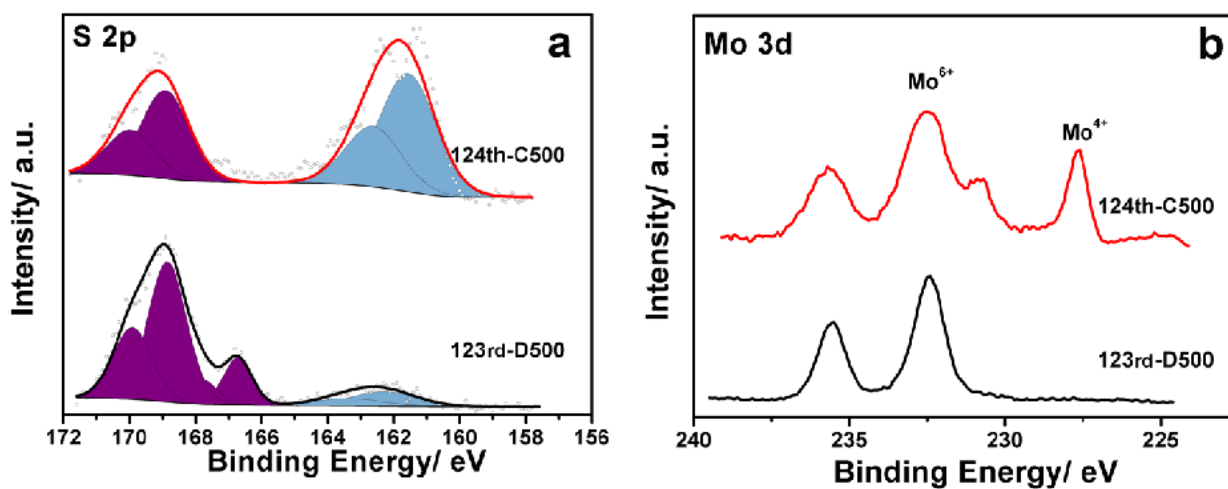

**Figure S13.** XPS spectra of the S 2p (a) and Mo 3d (b) at 123rd discharge and 124th charge state. After 123 cycles, MoS<sub>2</sub> is still responsible for the charge compensation during cycling, which is oxidized after discharge and recovered after charge.



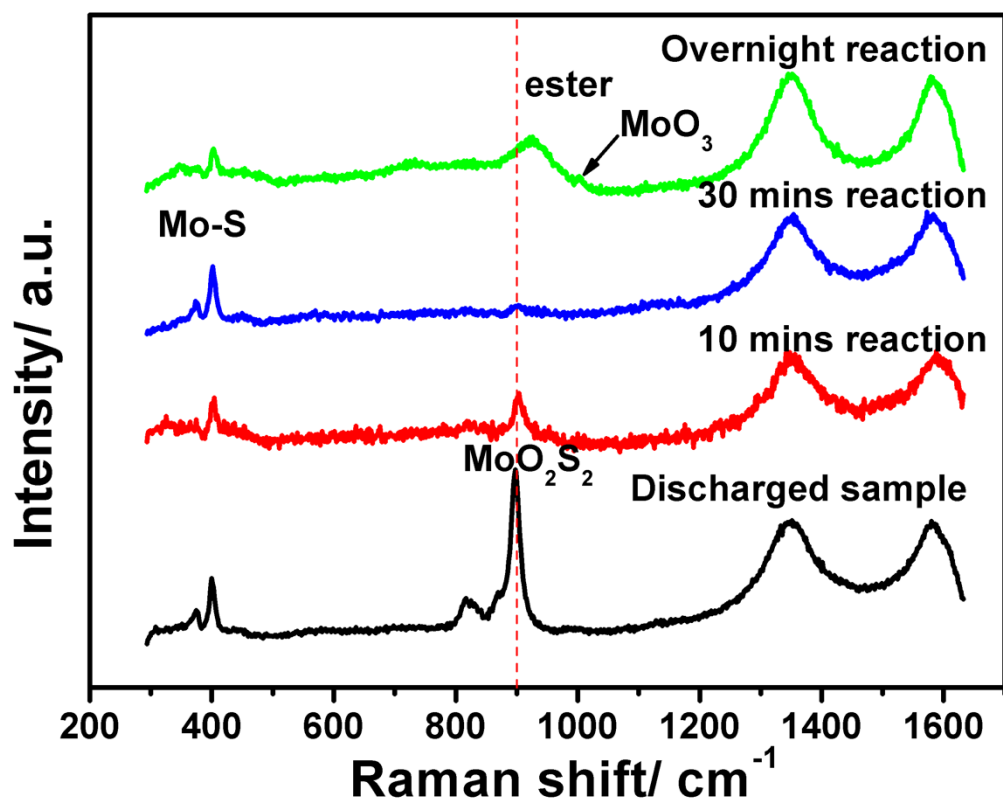

**Figure S14.** Raman spectra of  $\text{Li}_2\text{MoO}_2\text{S}_2$  at different reaction time with 50 mM  $\text{I}_3^-/\text{DME}$  solution with 500 ppm  $\text{H}_2\text{O}$ . Overnight reaction will further oxidize the  $\text{MoS}_2$  to  $\text{MoO}_3$ .

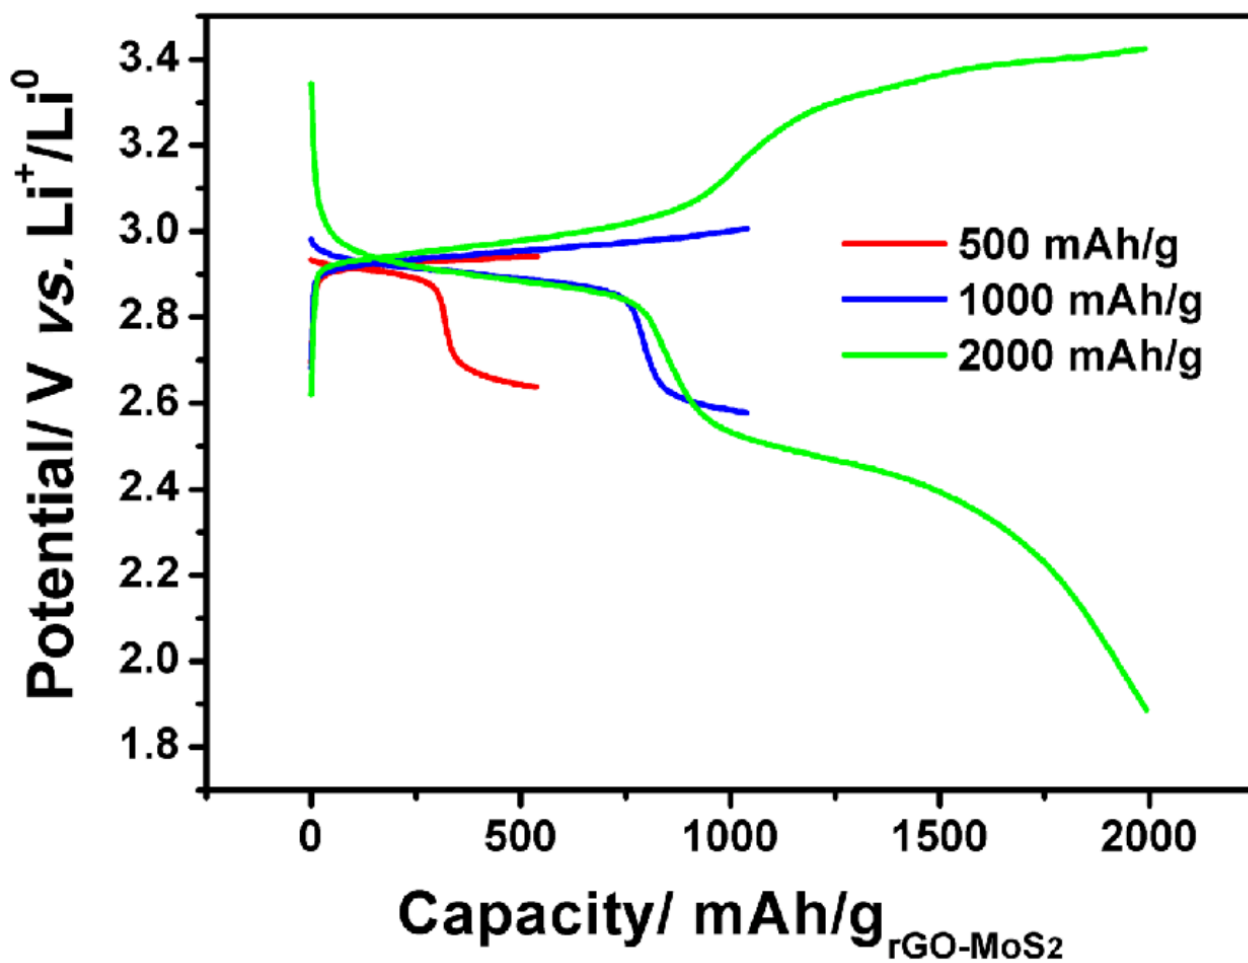

**Figure S15.** Limitation content of the inserted Li ions in the structure of MoS<sub>2</sub>. The higher capacity is achieved after multiple cycles. Based on the capacity between 2.5-3.1 V, the maximum content of the inserted Li is about 6 per formula of MoS<sub>2</sub>.

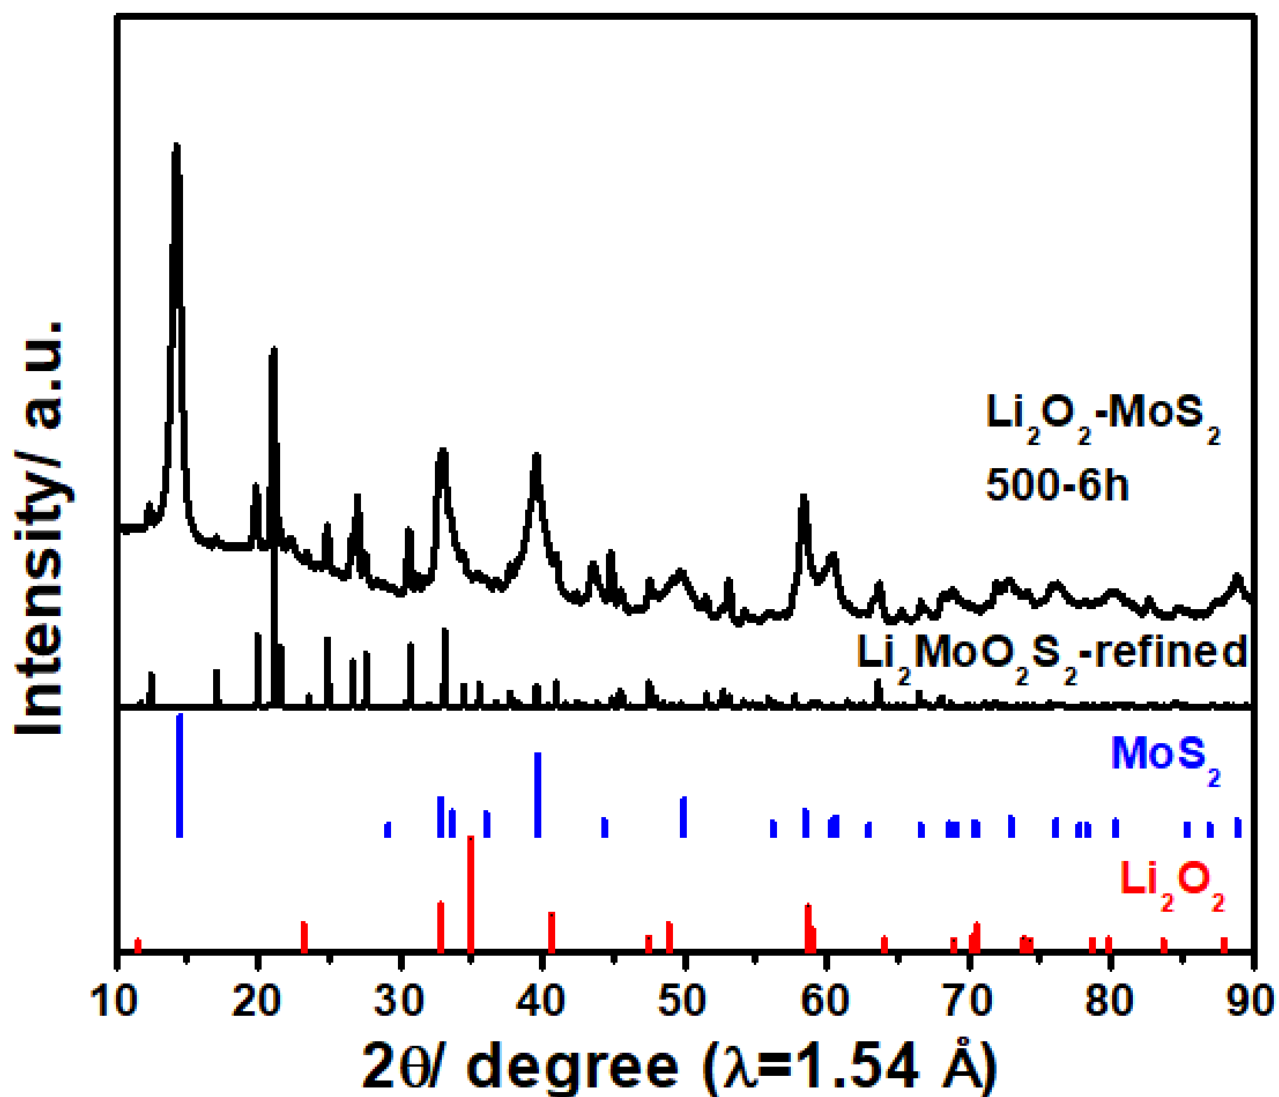

**Figure S16.** Compared the  $\text{Li}_2\text{O}_2$  and  $\text{MoS}_2$  composite after ball milling and heat-treatment and refined  $\text{Li}_2\text{MoO}_2\text{S}_2$  patterns with the standard XRD pattern of the  $\text{Li}_2\text{O}_2$  and  $\text{MoS}_2$ . The  $\text{Li}_2\text{O}_2$  and  $\text{MoS}_2$  composite was first ball milled at 500 rpm for 10 hours and then was heated in a sealed glass tube at 500 °C for 6 hours.  $\text{Li}_2\text{MoO}_2\text{S}_2$  was got and more trials are needed to purify the phase.
